# Supplementary material for: Chiral recognition of amino acids through homochiral metallacycle [ZnCl2L]2
Source: Royal Society of Chemistry journal article supplement (doi:10.1039/d4bm01119h), 2024-11-22
Supplement: d4bm01119h1.pdf [file d4bm01119h1.pdf]

## Supporting Information

### Chiral Recognition of Amino Acids Through Homochiral Metallacycle [ZnCl<sub>2</sub>L]<sub>2</sub>

*Maria Maqbool<sup>a</sup> & Khurshid Ayub<sup>a\*</sup>*

<sup>a</sup> Department of Chemistry, COMSATS University, Abbottabad Campus, KPK, Pakistan 22060

\*Corresponding author.

Tel: +92-992-383591.

E-mail: [khurshid@cuiatd.edu.pk](mailto:khurshid@cuiatd.edu.pk) (K.A.)

**Table S1:** The  $E_{\text{int}}$  of the possible orientations of amino acids inside the metallacycle.

| <b>Complexes</b>          | <b><math>E_{\text{int}}</math> (kcal/mol)</b> |
|---------------------------|-----------------------------------------------|
| <b>R-ala@metallacycle</b> | -17.05                                        |
|                           | -28.38                                        |
|                           | -28.38                                        |
| <b>S-ala@metallacycle</b> | -30.4                                         |
|                           | -30.59                                        |
|                           | -31.49                                        |
| <b>R-pro@metallacycle</b> | -26.09                                        |
|                           | -30.23                                        |
|                           | -26.19                                        |
| <b>S-pro@metallacycle</b> | -32.17                                        |
|                           | -28.33                                        |
|                           | -25.65                                        |
| <b>R-ser@metallacycle</b> | -30.75                                        |
|                           | -26.70                                        |
|                           | -22.46                                        |
| <b>S-ser@metallacycle</b> | -33.03                                        |
|                           | -32.45                                        |
|                           | -33.02                                        |
| <b>R-val@metallacycle</b> | -30.27                                        |
|                           | -21.48                                        |
|                           | -20.33                                        |
| <b>S-val@metallacycle</b> | -27.68                                        |
|                           | -15.91                                        |
|                           | -27.78                                        |

**Table S2:** Interaction energies of complexes when amino acids are in zwitterionic form in gas phase and solvents (H<sub>2</sub>O and DCM).

| Complexes          | $E_{\text{int}}$ of zwitterion in gas phase (kcal/mol) | $E_{\text{int}}$ of zwitterion in H <sub>2</sub> O (kcal/mol) | $E_{\text{int}}$ of zwitterion in DCM (kcal/mol) |
|--------------------|--------------------------------------------------------|---------------------------------------------------------------|--------------------------------------------------|
| R-ala@metallacycle | -17.77                                                 | -25.01                                                        | -23.60                                           |
| S-ala@metallacycle | -18.09                                                 | -24.23                                                        | -23.37                                           |
| R-pro@metallacycle | -18.79                                                 | -26.11                                                        | -25.41                                           |
| S-pro@metallacycle | -27.10                                                 | -24.41                                                        | -23.63                                           |
| R-ser@metallacycle | -24.46                                                 | -16.67                                                        | -28.10                                           |
| S-ser@metallacycle | -18.48                                                 | -25.56                                                        | -32.59                                           |
| R-val@metallacycle | -18.24                                                 | -22.27                                                        | -20.25                                           |
| R-val@metallacycle | -20.20                                                 | -13.86                                                        | -13.26                                           |

**Table S3:** QTAIM parameters for R and S enantiomeric complexes of ala@metallacycle, pro@metallacycle, ser@metallacycle and val@metallacycle.

| Complexes          | Analyte-metallacycle | CPs    | $\rho$ (a.u) | $\nabla^2\rho$ (a.u) | G (r) (a.u) | V (r) (a.u) | H (r) (a.u) | -V/G | $E_{\text{int}}$ (kcal mol <sup>-1</sup> ) |
|--------------------|----------------------|--------|--------------|----------------------|-------------|-------------|-------------|------|--------------------------------------------|
| S-ala@metallacycle | N93-C81              | 232    | 0.0058       | 0.016                | 0.0034      | -0.0028     | 0.0006      | 0.82 | 0.88                                       |
|                    | O98-C47              | 215    | 0.0081       | 0.030                | 0.0064      | -0.0010     | 0.0010      | 0.16 | 0.31                                       |
|                    | O98-C39              | 212    | 0.0073       | 0.025                | 0.0054      | -0.0045     | 0.0009      | 0.83 | 1.41                                       |
|                    | H92-C31              | 186    | 0.0054       | 0.018                | 0.0036      | -0.0029     | 0.0007      | 0.80 | 0.91                                       |
|                    | O97-C69              | 229    | 0.0087       | 0.026                | 0.0055      | -0.0043     | 0.0011      | 0.78 | 1.35                                       |
|                    | H90-O9               | 170    | 0.0096       | 0.035                | 0.0079      | -0.0071     | 0.0008      | 0.90 | 2.23                                       |
|                    | H90-C67              | 150    | 0.0032       | 0.010                | 0.0019      | -0.0013     | 0.0006      | 0.68 | 0.41                                       |
|                    | O97-N5               | 132    | 0.0085       | 0.031                | 0.0069      | -0.0061     | 0.0007      | 0.88 | 1.91                                       |
|                    | H88-C76              | 143    | 0.0086       | 0.027                | 0.0056      | -0.0044     | 0.0012      | 0.79 | 1.38                                       |
|                    | O97-C16              | 144    | 0.0052       | 0.019                | 0.0036      | -0.0024     | 0.0011      | 0.67 | 0.75                                       |
| H94-O12            | 193                  | 0.0207 | 0.055        | 0.0148               | -0.0159     | -0.0011     | 1.07        | 4.99 |                                            |
| R-ala@metallacycle | O98-C67              | 225    | 0.0085       | 0.030                | 0.0066      | -0.0057     | 0.0009      | 0.86 | 1.79                                       |
|                    | O97-C51              | 209    | 0.0039       | 0.015                | 0.0029      | -0.0021     | 0.0008      | 0.72 | 0.66                                       |
|                    | O97-C16              | 212    | 0.0092       | 0.033                | 0.0073      | -0.0062     | 0.0011      | 0.85 | 1.94                                       |
|                    | H91-C76              | 226    | 0.0061       | 0.020                | 0.0039      | -0.0028     | 0.0011      | 0.72 | 0.88                                       |
|                    | H94-O12              | 173    | 0.0186       | 0.051                | 0.0135      | -0.0143     | -0.0008     | 1.06 | 4.49                                       |
|                    | N93-C81              | 131    | 0.0089       | 0.026                | 0.0057      | -0.0049     | 0.0008      | 0.86 | 1.54                                       |
|                    | H88-C31              | 143    | 0.0112       | 0.034                | 0.0073      | -0.0061     | 0.0012      | 0.84 | 1.91                                       |
|                    | O98-C69              | 166    | 0.0056       | 0.019                | 0.0040      | -0.0033     | 0.0008      | 0.82 | 1.04                                       |
| H99-O9             | 192                  | 0.0338 | 0.101        | 0.0253               | -0.0253     | -0.0001     | 1           | 7.94 |                                            |
| R-ala@metallacycle | H8-O29               | 218    | 0.0116       | 0.036                | 0.0086      | -0.0082     | 0.0004      | 0.95 | 2.57                                       |
|                    | H9-C64               | 251    | 0.0063       | 0.020                | 0.0039      | -0.0028     | 0.0011      | 0.72 | 0.88                                       |
|                    | H10-C64              | 239    | 0.0058       | 0.019                | 0.0039      | -0.0029     | 0.0009      | 0.74 | 0.91                                       |
|                    | H10-N20              | 268    | 0.0060       | 0.019                | 0.0038      | -0.0027     | 0.0010      | 0.71 | 0.85                                       |
|                    | H8-C56               | 242    | 0.0072       | 0.023                | 0.0048      | -0.0039     | 0.0009      | 0.81 | 1.22                                       |
|                    | H5-C85               | 241    | 0.0085       | 0.027                | 0.0055      | -0.0043     | 0.0012      | 0.78 | 1.35                                       |

|                        |          |        |        |        |         |         |         |      |      |
|------------------------|----------|--------|--------|--------|---------|---------|---------|------|------|
| S-<br>pro@metallacycle | H5-C39   | 209    | 0.0070 | 0.021  | 0.0042  | -0.0032 | 0.0010  | 0.76 | 1.00 |
|                        | H17-C52  | 214    | 0.0085 | 0.029  | 0.0064  | -0.0055 | 0.0009  | 0.86 | 1.72 |
|                        | H14-O26  | 194    | 0.0333 | 0.115  | 0.0268  | -0.0249 | 0.0020  | 0.93 | 7.81 |
|                        | C11-H69  | 135    | 0.0077 | 0.025  | 0.0053  | -0.0043 | 0.0010  | 0.81 | 1.35 |
|                        | O12-H41  | 131    | 0.0096 | 0.039  | 0.0081  | -0.0065 | 0.0016  | 0.80 | 2.04 |
|                        | H6-C40   | 138    | 0.0066 | 0.022  | 0.0044  | -0.0034 | 0.0010  | 0.77 | 1.07 |
|                        | H4-C94   | 174    | 0.0068 | 0.024  | 0.0047  | -0.0034 | 0.0013  | 0.72 | 1.07 |
|                        | H7-C35   | 164    | 0.0069 | 0.020  | 0.0041  | -0.0032 | 0.0009  | 0.78 | 1.00 |
|                        | C58-O26  | 167    | 0.0029 | 0.012  | 0.0024  | -0.0016 | 0.0007  | 0.67 | 0.50 |
|                        | O13-O26  | 162    | 0.0042 | 0.013  | 0.0026  | -0.0020 | 0.0007  | 0.77 | 0.63 |
| R-<br>pro@metallacycle | H11-C75  | 253    | 0.0053 | 0.017  | 0.0034  | -0.0024 | 0.0009  | 0.70 | 0.75 |
|                        | H12-N25  | 265    | 0.0065 | 0.022  | 0.0044  | -0.0033 | 0.0011  | 0.75 | 1.03 |
|                        | H12-C46  | 270    | 0.0055 | 0.018  | 0.0036  | -0.0026 | 0.0009  | 0.72 | 0.82 |
|                        | H10-C56  | 235    | 0.0080 | 0.026  | 0.0052  | -0.0040 | 0.0012  | 0.77 | 1.26 |
|                        | H8-C40   | 232    | 0.0095 | 0.030  | 0.0062  | -0.0049 | 0.0013  | 0.79 | 1.53 |
|                        | H7-O26   | 215    | 0.0094 | 0.031  | 0.0070  | -0.0063 | 0.0007  | 0.90 | 1.98 |
|                        | H17-O26  | 198    | 0.0362 | 0.124  | 0.0290  | -0.0272 | 0.0018  | 0.94 | 8.53 |
|                        | O15-H41  | 129    | 0.0100 | 0.040  | 0.0084  | -0.0067 | 0.0017  | 0.80 | 2.10 |
|                        | H8-N23   | 138    | 0.0082 | 0.027  | 0.0058  | -0.0048 | 0.0010  | 0.83 | 1.51 |
|                        | H6-C93   | 171    | 0.0051 | 0.016  | 0.0032  | -0.0023 | 0.0009  | 0.72 | 0.72 |
|                        | H9-C73   | 163    | 0.0068 | 0.020  | 0.0040  | -0.0030 | 0.0010  | 0.75 | 0.94 |
|                        | H11-C29  | 219    | 0.0101 | 0.031  | 0.0074  | -0.0070 | 0.0004  | 0.95 | 2.20 |
|                        | O15-C91  | 126    | 0.0078 | 0.028  | 0.0058  | -0.0047 | 0.0012  | 0.81 | 1.48 |
|                        | O16-C84  | 149    | 0.0065 | 0.024  | 0.0049  | -0.0038 | 0.0011  | 0.78 | 1.19 |
| N13-N22                | 140      | 0.0069 | 0.023  | 0.0050 | -0.0043 | 0.0007  | 0.86    | 1.35 |      |
| H10-C64                | 227      | 0.0044 | 0.015  | 0.0029 | -0.0021 | 0.0008  | 0.72    | 0.66 |      |
| S-<br>ser@metallacycle | O6-C30   | 214    | 0.0054 | 0.019  | 0.0038  | -0.0029 | 0.0009  | 0.76 | 0.91 |
|                        | O6-C65   | 218    | 0.0082 | 0.029  | 0.0062  | -0.0052 | 0.0010  | 0.84 | 1.63 |
|                        | O6-C53   | 158    | 0.0025 | 0.017  | 0.0034  | -0.0024 | 0.0009  | 0.71 | 0.75 |
|                        | H3-O23   | 202    | 0.0167 | 0.048  | 0.0124  | -0.0130 | -0.0004 | 1.05 | 4.08 |
|                        | H4-C55   | 238    | 0.0076 | 0.028  | 0.0056  | -0.0041 | 0.0015  | 0.73 | 1.29 |
|                        | H14-C53  | 149    | 0.0092 | 0.029  | 0.0059  | -0.0048 | 0.0012  | 0.81 | 1.51 |
|                        | O7-C61   | 138    | 0.0084 | 0.030  | 0.0066  | -0.0057 | 0.0009  | 0.86 | 1.79 |
|                        | O7-C70   | 195    | 0.0086 | 0.027  | 0.0061  | -0.0053 | 0.0008  | 0.87 | 1.66 |
|                        | O12-C47  | 146    | 0.0060 | 0.020  | 0.0041  | -0.0033 | 0.0008  | 0.80 | 1.04 |
|                        | H12-O26  | 191    | 0.0360 | 0.107  | 0.0267  | -0.0266 | 0.0002  | 0.99 | 8.35 |
| H11-C90                | 241      | 0.0104 | 0.031  | 0.0066 | -0.0055 | 0.0011  | 0.83    | 1.73 |      |
| R-<br>ser@metallacycle | N88-C76  | 227    | 0.0080 | 0.025  | 0.0053  | -0.0045 | 0.0009  | 0.85 | 1.41 |
|                        | O92-C56  | 193    | 0.0086 | 0.029  | 0.0062  | -0.0053 | 0.0009  | 0.86 | 1.66 |
|                        | H89-O12  | 190    | 0.0126 | 0.038  | 0.0095  | -0.0095 | 0.0001  | 1    | 3.00 |
|                        | O92-C81  | 141    | 0.0074 | 0.028  | 0.0060  | -0.0051 | 0.0009  | 0.85 | 1.60 |
|                        | H100-C31 | 154    | 0.0077 | 0.022  | 0.0045  | -0.0034 | 0.0010  | 0.76 | 1.07 |
|                        | O93-C39  | 152    | 0.0062 | 0.021  | 0.0045  | -0.0037 | 0.0008  | 0.82 | 1.16 |
|                        | H99-O9   | 198    | 0.0370 | 0.114  | 0.0280  | -0.0280 | 0.0002  | 1    | 8.78 |
|                        | O9-C74   | 238    | 0.0095 | 0.032  | 0.0068  | -0.0060 | 0.0011  | 0.88 | 1.88 |
|                        | O93-C51  | 202    | 0.0055 | 0.019  | 0.0041  | -0.0033 | 0.0008  | 0.80 | 1.04 |
|                        | H96-C23  | 250    | 0.0071 | 0.024  | 0.0050  | -0.0034 | 0.0013  | 0.68 | 1.07 |
|                        | O3-C88   | 219    | 0.0100 | 0.038  | 0.0081  | -0.0067 | 0.0014  | 0.83 | 2.10 |
|                        | O2-C86   | 167    | 0.0059 | 0.019  | 0.0041  | -0.0033 | 0.0007  | 0.80 | 1.04 |

|                    |           |        |        |        |         |         |        |      |      |
|--------------------|-----------|--------|--------|--------|---------|---------|--------|------|------|
| S-val@metallacycle | H4-O28    | 208    | 0.0411 | 0.123  | 0.0308  | -0.0310 | 0.0007 | 1.01 | 9.73 |
|                    | O3-C60    | 170    | 0.0097 | 0.032  | 0.0072  | -0.0062 | 0.0009 | 0.86 | 1.94 |
|                    | H7-C58    | 225    | 0.0036 | 0.011  | 0.0023  | -0.0017 | 0.0006 | 0.74 | 0.53 |
|                    | H8-N22    | 238    | 0.0056 | 0.019  | 0.0040  | -0.0031 | 0.0008 | 0.78 | 0.97 |
|                    | H9-N27    | 242    | 0.0098 | 0.032  | 0.0070  | -0.0061 | 0.0010 | 0.87 | 1.91 |
|                    | H10-C48   | 240    | 0.0053 | 0.018  | 0.0037  | -0.0027 | 0.0009 | 0.73 | 0.85 |
|                    | H15-C75   | 156    | 0.0061 | 0.019  | 0.0038  | -0.0028 | 0.0010 | 0.74 | 0.88 |
|                    | H15-O32   | 180    | 0.0040 | 0.015  | 0.0031  | -0.0023 | 0.0008 | 0.74 | 0.72 |
|                    | N16-C70   | 134    | 0.0100 | 0.029  | 0.0066  | -0.0058 | 0.0008 | 0.88 | 1.82 |
|                    | H19-N25   | 146    | 0.0084 | 0.030  | 0.0064  | -0.0052 | 0.0011 | 0.81 | 1.63 |
|                    | C81-H14   | 212    | 0.0073 | 0.024  | 0.0047  | -0.0035 | 0.0012 | 0.74 | 1.10 |
| H4-O30             | 204       | 0.0072 | 0.028  | 0.0064 | -0.0060 | 0.0005  | 0.94   | 1.88 |      |
| R-val@metallacycle | H13-C100  | 227    | 0.0056 | 0.018  | 0.0035  | -0.0025 | 0.0010 | 0.71 | 0.78 |
|                    | H9-C1103  | 274    | 0.0025 | 0.007  | 0.0014  | -0.0010 | 0.0004 | 0.71 | 0.31 |
|                    | H18-C1105 | 125    | 0.0084 | 0.026  | 0.0054  | -0.0043 | 0.0011 | 0.80 | 1.35 |
|                    | O3-C93    | 154    | 0.0065 | 0.024  | 0.0050  | -0.0039 | 0.0010 | 0.78 | 1.22 |
|                    | O2-C93    | 160    | 0.0058 | 0.021  | 0.0043  | -0.0033 | 0.0010 | 0.77 | 1.04 |
|                    | O3-C54    | 210    | 0.0099 | 0.034  | 0.0073  | -0.0062 | 0.0012 | 0.85 | 1.94 |
|                    | H10-C48   | 259    | 0.0050 | 0.018  | 0.0033  | -0.0023 | 0.0011 | 0.70 | 0.72 |
|                    | H7-C48    | 251    | 0.0039 | 0.013  | 0.0025  | -0.0018 | 0.0007 | 0.72 | 0.56 |
|                    | N16-C42   | 144    | 0.0072 | 0.025  | 0.0051  | -0.0040 | 0.0012 | 0.78 | 1.26 |
|                    | H19-N25   | 151    | 0.0088 | 0.028  | 0.0059  | -0.0051 | 0.0009 | 0.86 | 1.60 |
|                    | H13-O31   | 200    | 0.0057 | 0.021  | 0.0044  | -0.0035 | 0.0009 | 0.80 | 1.10 |
|                    | H13-C37   | 184    | 0.0065 | 0.021  | 0.0041  | -0.0030 | 0.0011 | 0.73 | 0.94 |
|                    | H4-O28    | 196    | 0.0370 | 0.110  | 0.0273  | -0.0270 | 0.0002 | 0.99 | 8.47 |
|                    | C11-C41   | 218    | 0.0088 | 0.032  | 0.0070  | -0.0058 | 0.0011 | 0.83 | 1.82 |

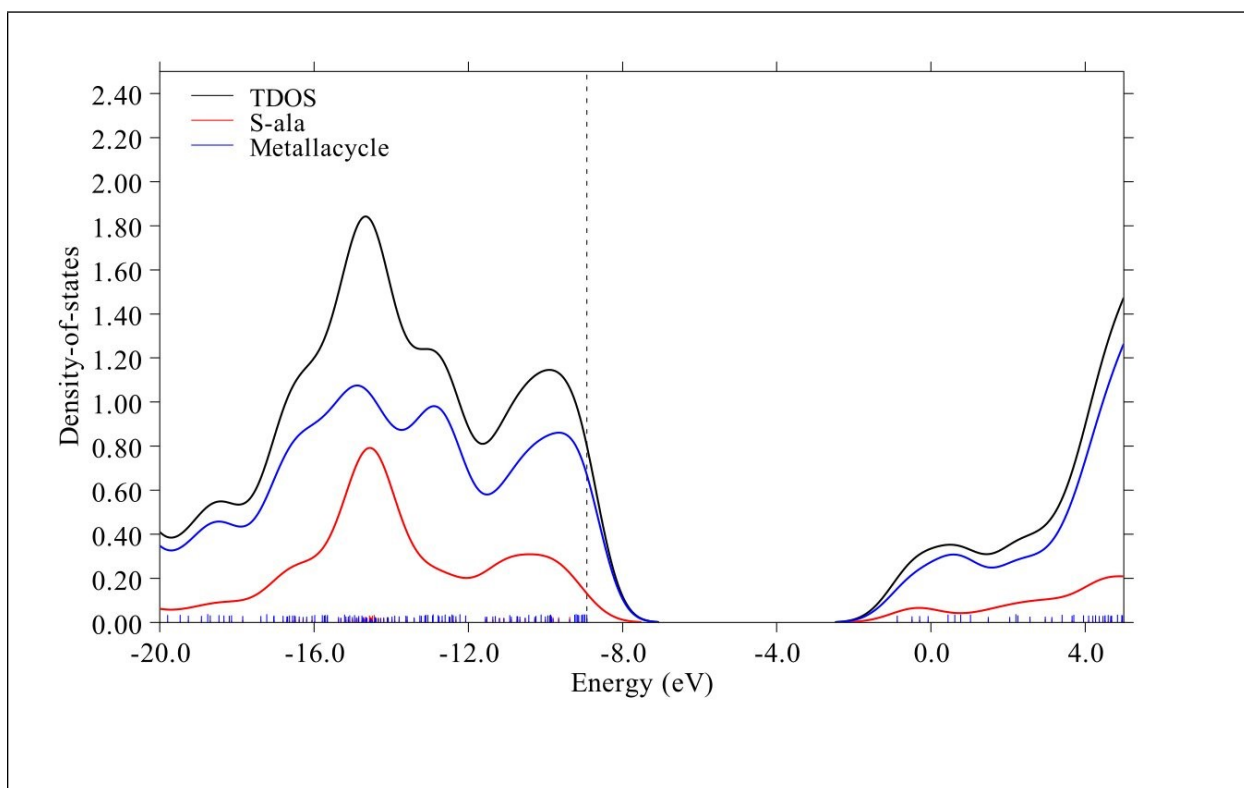

S-ala@metallacycle

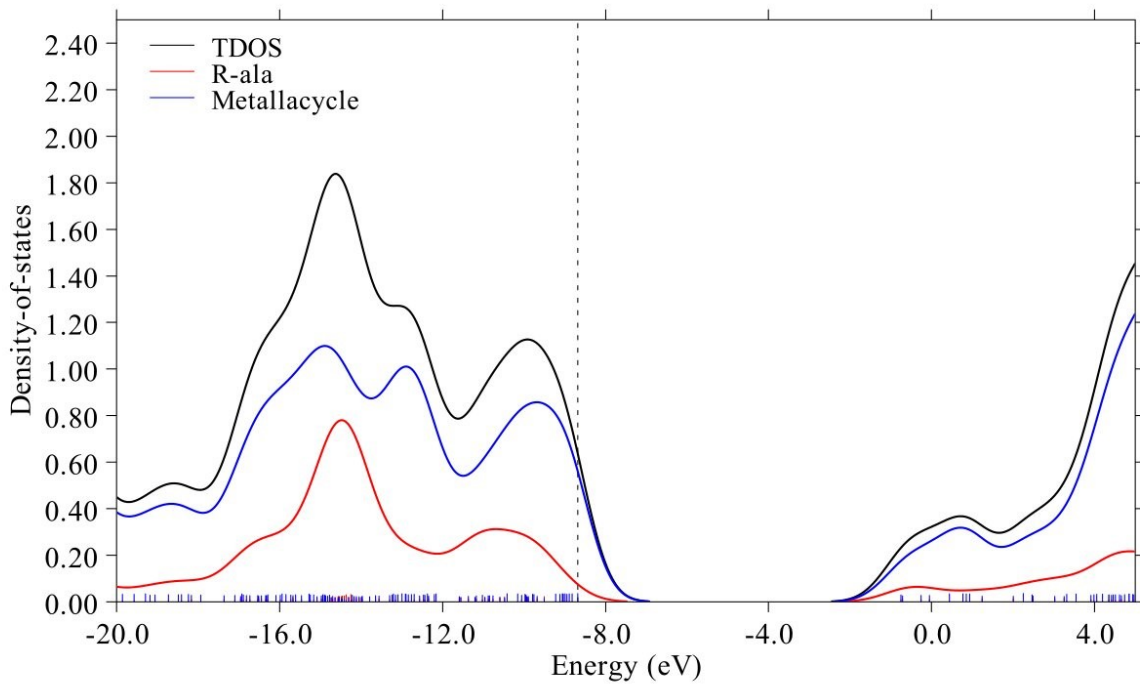

R-ala@metallacycle

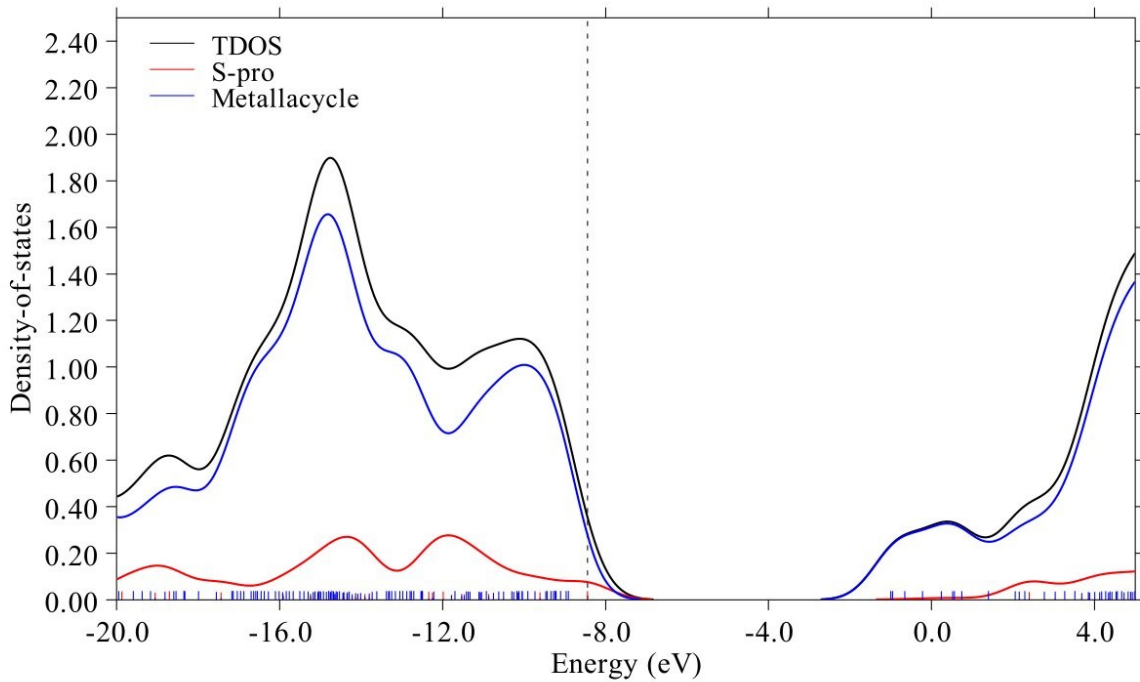

S-pro@metallacycle

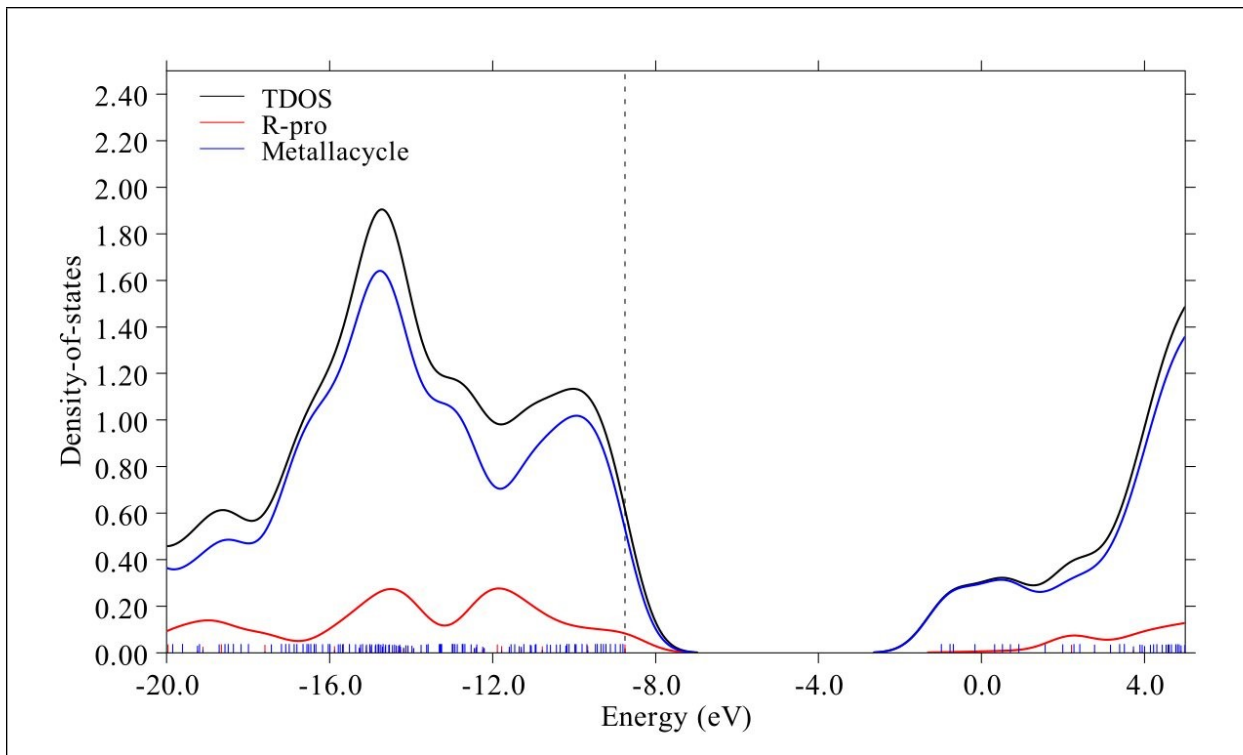

R-pro@metallacycle

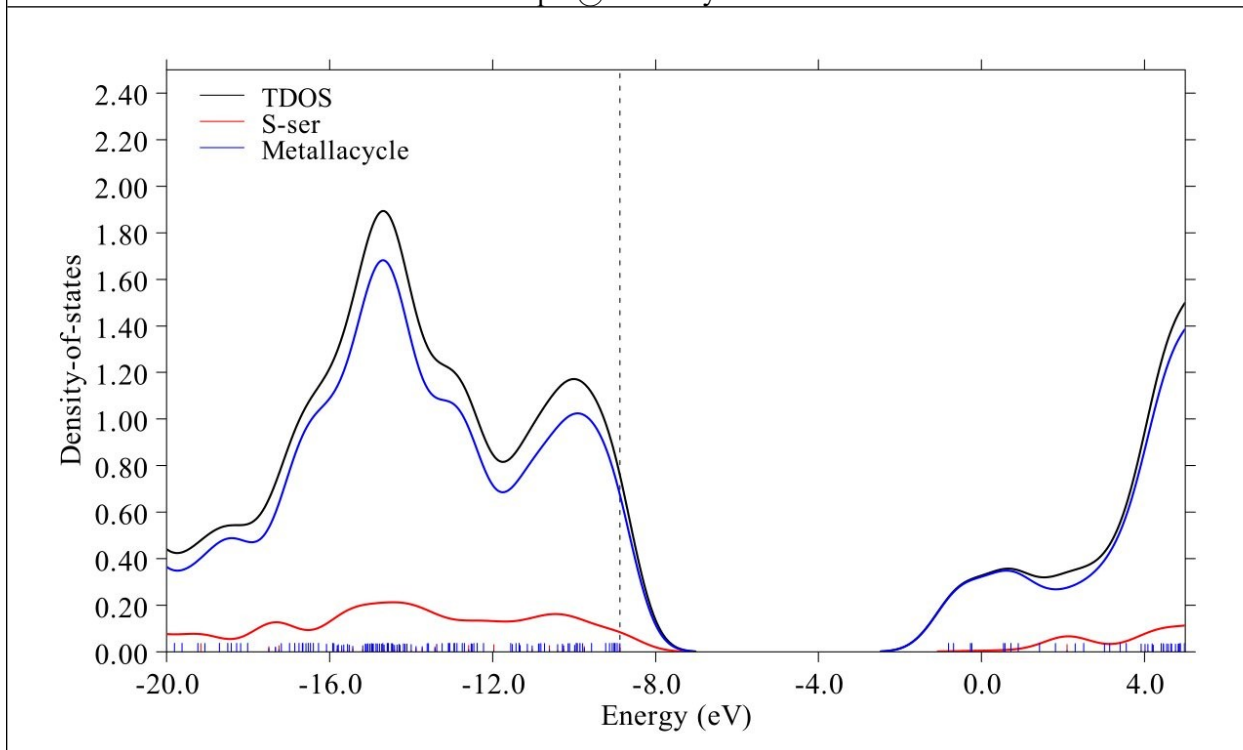

S-ser@metallacycle

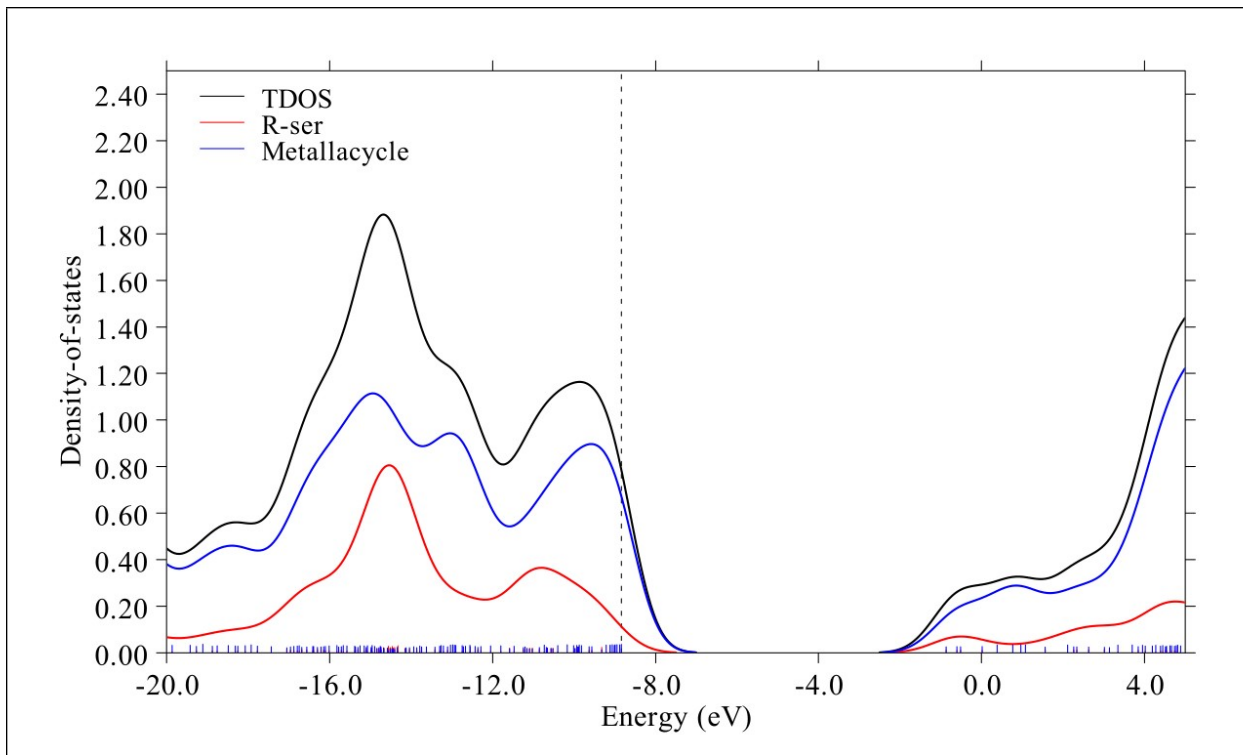

R-ser@metallacycle

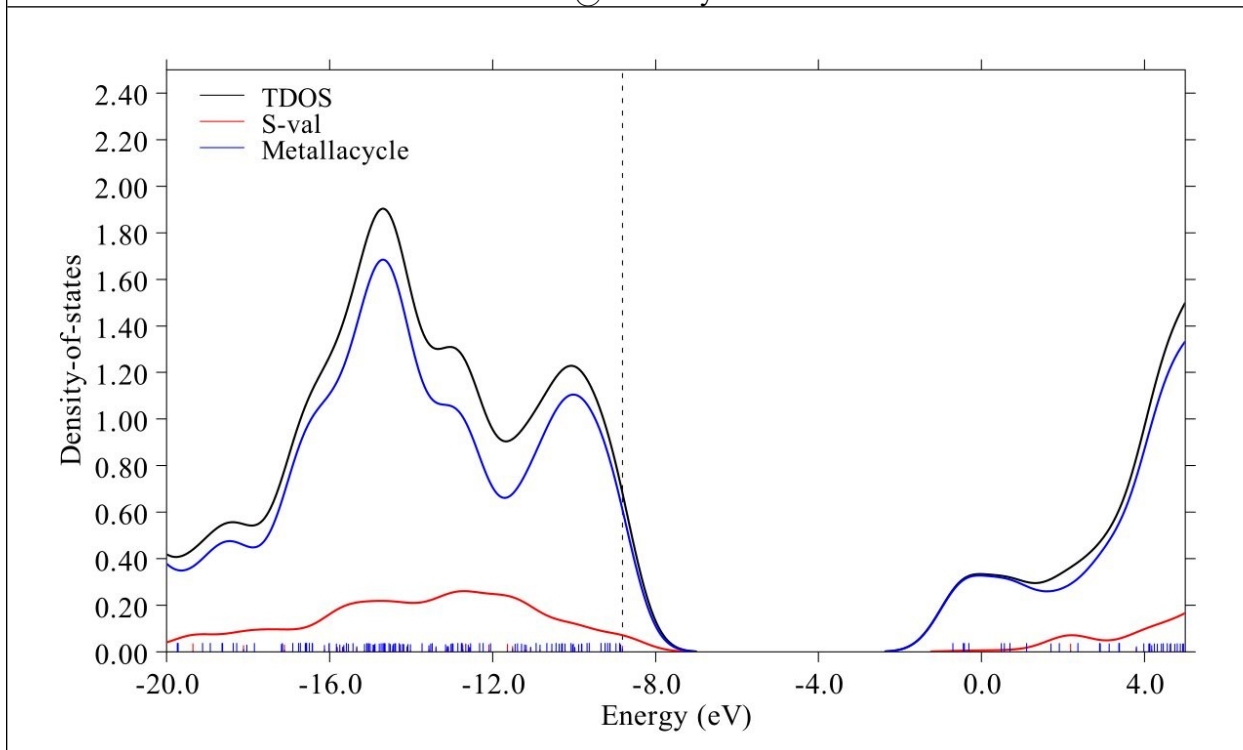

S-val@metallacycle



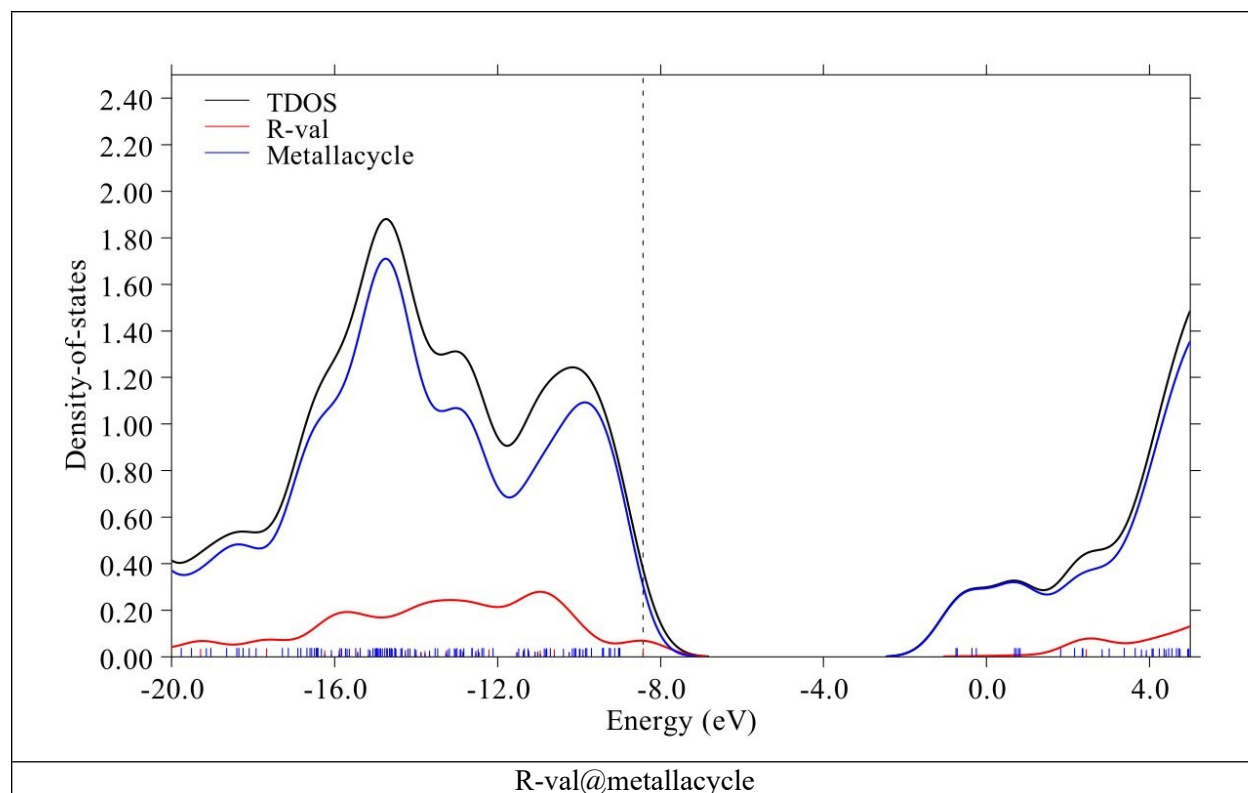

**Figure S1:** DOS spectra for the complexes of S-amino acids@metallacycle.

## 1. FMO Analysis

Frontier molecular orbital (FMO) analysis is very important to predict the reactivity of molecules. The HOMO determines the nucleophilic ability, while the LUMO determines the electrophilic ability of molecules. Consequently, the chemical reactivity and stability of the molecule can be determined through FMO analysis. FMO analysis also serves to provide information about the electronic behavior of the molecule *i.e.*, the change in the electronic properties of the guest molecule, after it has been encapsulated inside the cavity of the host. The values of the energies of HOMO, LUMO and HOMO-LUMO energy gaps of the metallacycle, amino acids and the amino-acid@metallacycle complexes are given in Table 2, while the HOMO, LUMO iso-densities are shown in Figure 3. The  $E_{\text{HOMO}}$ ,  $E_{\text{LUMO}}$ , and  $E_{\text{gap}}$  of the bare metallacycle are -6.85, -2.66 and 4.19 eV, respectively. The  $E_{\text{HOMO}}$  of the amino acid enantiomers is smaller than bare metallacycle *i.e.*, ranging between -8.64 and -9.39 eV, while  $E_{\text{LUMO}}$  is significantly larger than that of the metallacycle *i.e.*, 2.23 to 2.56 eV. Due to this huge difference between the energies of HOMO and LUMO of the amino acids, the energy gaps of amino acids are considerably greater *i.e.*, 10.98 to 11.76 eV. Upon complex formation between amino acids and the metallacycle, the values of energy gap are reduced compared to bare amino acids, *i.e.*, ranging from 7.44-8.10 eV. This

reduction in  $E_{\text{gap}}$  is due to the substantial decrease in the position and energy of the LUMO after complexation *i.e.*, -0.70 to -1.00 eV. In comparison of the energy gaps of R and S enantiomeric complexes, it is observed that except for S-pro@metallacycle, in all the other cases, R-amino acid@metallacycle has comparatively lower energy gap. The reason behind this is the lower energy gap, and the relative positions of HOMO and LUMO of the amino acid enantiomer forming the complex.

It can be seen in the visual representations of FMO that, the HOMO iso-densities in case of bare metallacycle resides on  $\text{ZnCl}_2$  group, whereas the LUMO iso-densities are located on the pyridine rings present on the opposite walls of the metallacycle. A significant change in the iso-densities is experienced upon the complexation of amino acid enantiomers with the metallacycle. In the R-ala@metallacycle complex, the HOMO iso-densities are present mainly on the alanine along with one side of the metallacycle, while the LUMO iso-densities exist merely on the metallacycle. This behavior is due to the fact that the HOMO level of the metallacycle and R-alanine are close enough that they can interact, resulting in the presence of iso-densities on both the species in the resulting complex. On the other hand, the LUMO levels of both the species are far away from each other in terms of their energies, so they can not interact, hence the LUMO iso-densities exist only on one specie *i.e.*, metallacycle in the resulting complex. In the S-ala@metallacycle complex, both the HOMO and LUMO iso-densities lie on the metallacycle, due to the significant difference in the positions of HOMO and LUMO of metallacycle and S-alanine from each other. The behavior seen in the R-pro@metallacycle is similar to that observed for the R-ala@metallacycle, whereas for S-pro@metallacycle, the HOMO and LUMO iso-densities are present on amino acid and metallacycle, respectively.

For the R-ser@metallacycle, the HOMO iso-densities are observed on serine (amino acid), along with one pyridine unit and  $\text{ZnCl}_2$  (in metallacycle). This is again due to the closer HOMO levels of the serine and metallacycle, whereas due to the greater difference in the values and positions of LUMO, the iso-densities appear only on one side of the metallacycle *i.e.*, on pyridine unit present along the side wall. Similarly, the HOMO and LUMO of S-ser@metallacycle show a similar pattern, due to the same reason as mentioned above. In case of R-val@metallacycle, the HOMO iso-densities are present mostly on the amino acid along with two small patches observed on the Cl of  $\text{ZnCl}_2$  (on metallacycle), because of considerably greater difference in the HOMO positions,

and the greater value of HOMO for the valine, due to which the newly formed HOMO closely resembles that of the valine. The LUMO iso-densities reside on the pyridine unit of metallacycle, alike the aforementioned complexes. For S-val@metallacycle, the HOMO iso-densities are seen on the valine as well as the metallacycle *i.e.*, on ZnCl<sub>2</sub> and pyridine unit, due to closer HOMO levels, while the LUMO iso-densities are seen on the pyridine unit of the metallacycle. Overall, a general trend is that the  $E_{\text{gap}}$  after complexation is reduced, and the HOMO and LUMO iso-densities after complexation are observed on both the species and on the metallacycle, respectively.

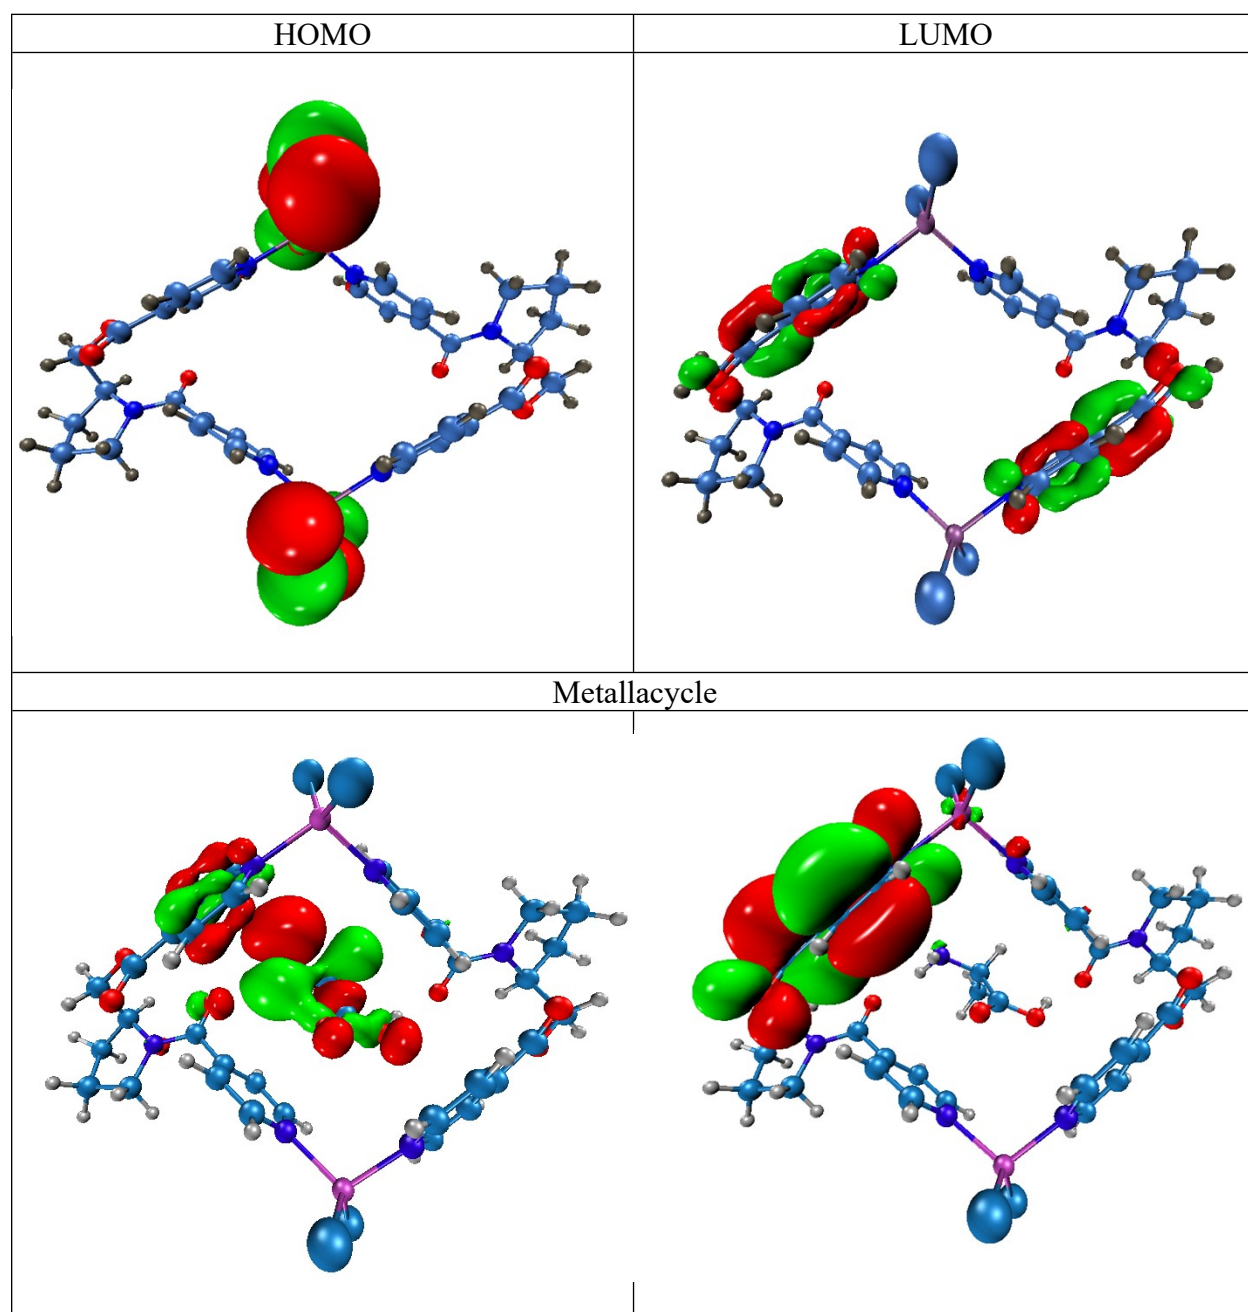

R-ala@metallacycle

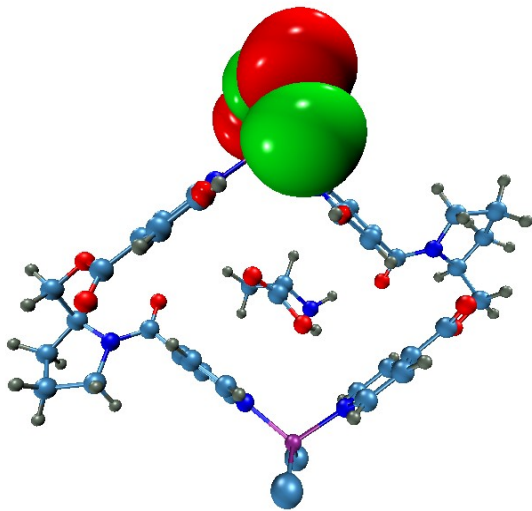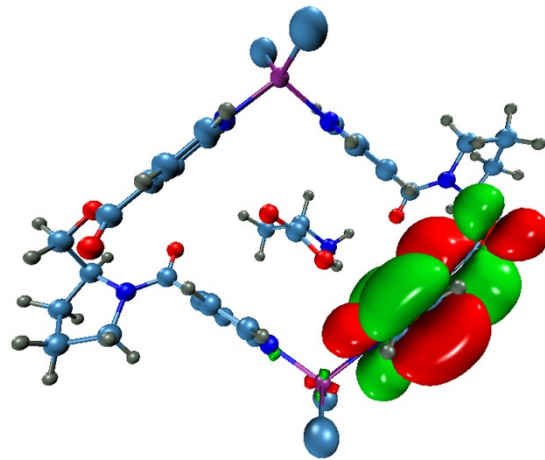

S-ala@metallacycle

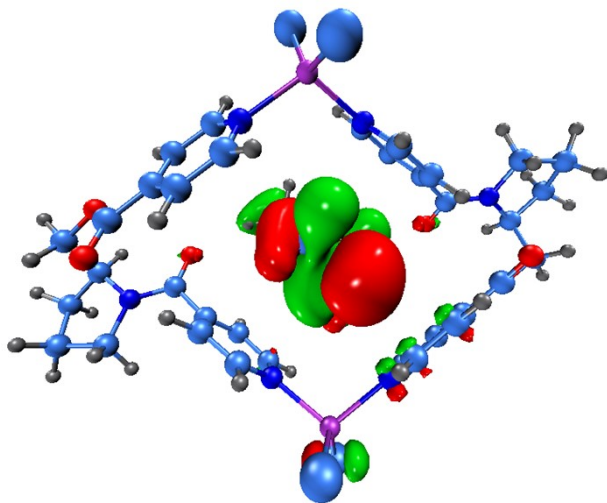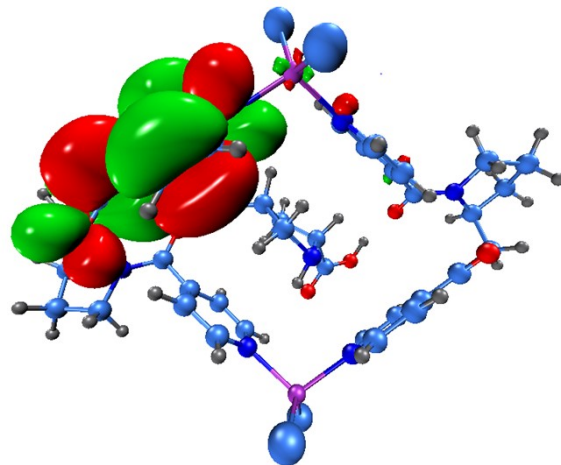

R-pro@metallacycle

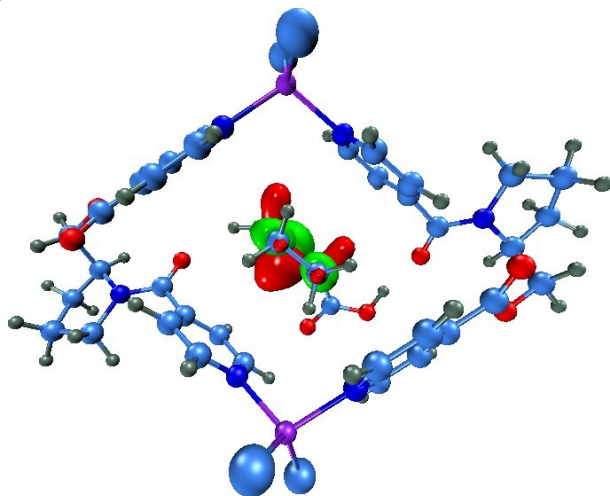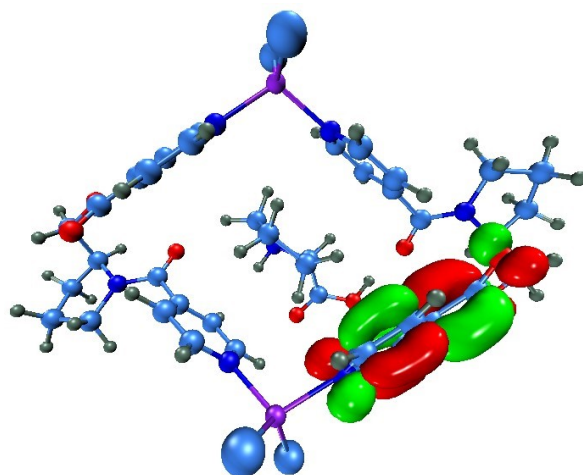

S-pro@metallacycle

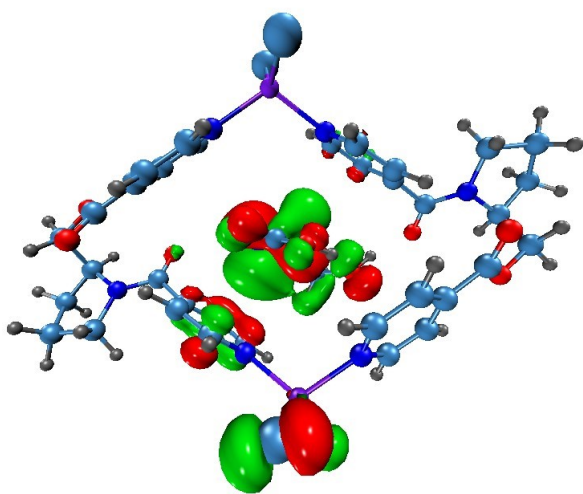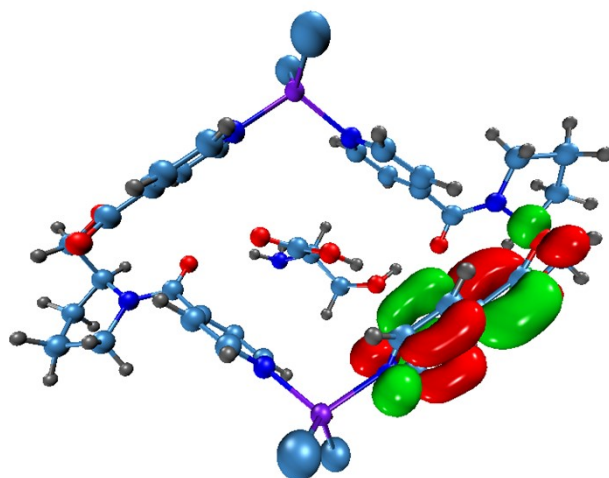

R-ser@metallacycle

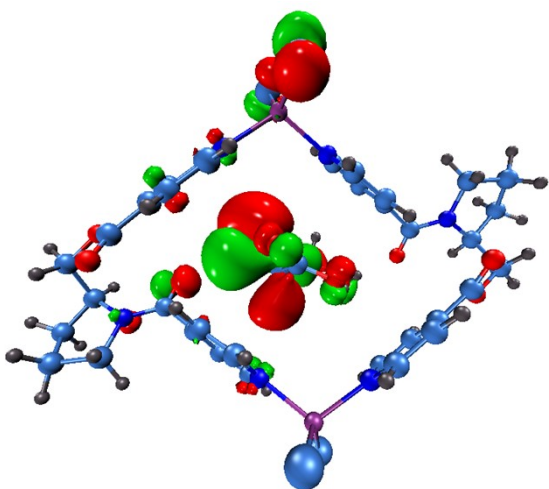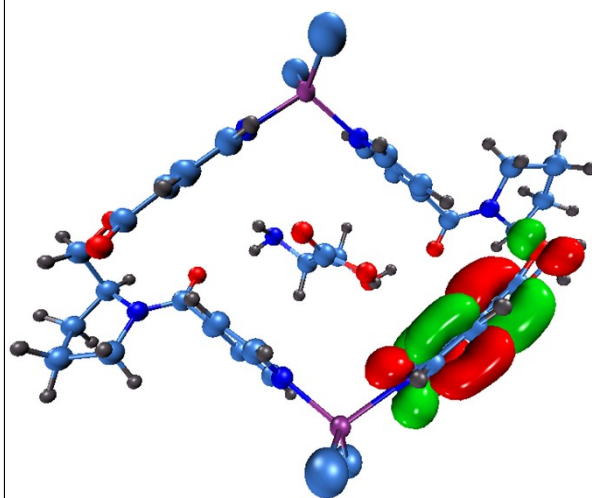

S-ser@metallacycle

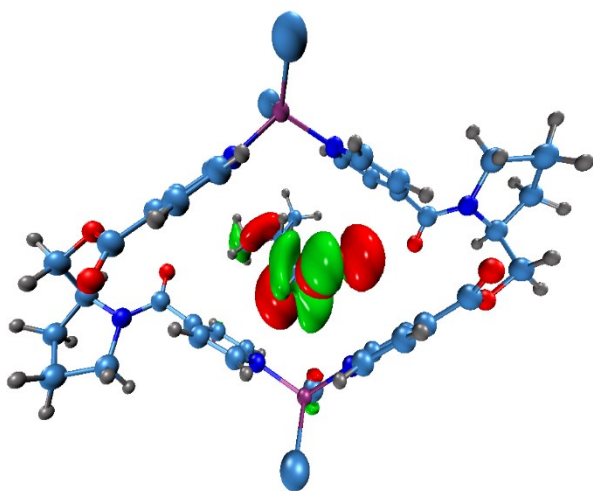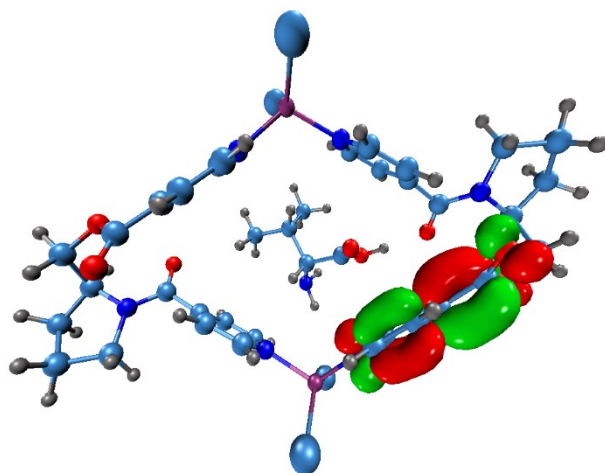



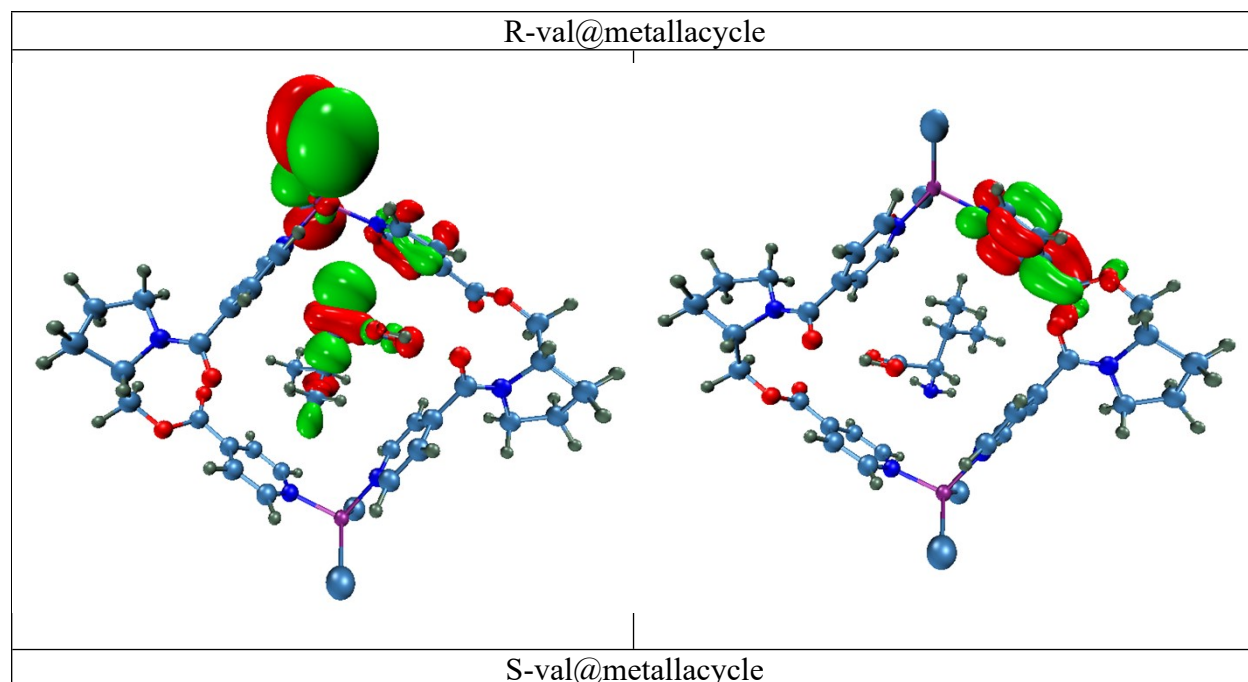

**Figure S2:** HOMO and LUMO isosurfaces of metallacycle and R and S enantiomers of amino acids@metallacycle complexes.

**Table S4:** Energy of HOMO ( $E_{\text{HOMO}}$ ), energy of LUMO ( $E_{\text{LUMO}}$ ), energy gap ( $E_{\text{gap}}$ ), and NBO charges ( $Q$ ) for metallacycle, R and S amino acids and R and S amino acids@metallacycle.

| Complexes          | $E_{\text{HOMO}}$<br>(eV) | $E_{\text{LUMO}}$ (eV) | $E_{\text{gap}}$ (eV) | $Q$  e | $E$ (2)                                               |
|--------------------|---------------------------|------------------------|-----------------------|--------|-------------------------------------------------------|
| Metallacycle       | -6.85                     | -2.66                  | 4.19                  | -      | -                                                     |
| R-alanine          | -9.06                     | 2.33                   | 11.39                 | -      | -                                                     |
| R-ala@metallacycle | -8.68                     | -0.75                  | 7.93                  | -0.058 | $\text{LP}_{\text{O}}\text{-BD}^*_{\text{O-H}}=10.64$ |
| S-alanine          | -8.72                     | 2.56                   | 11.28                 | -      | -                                                     |
| S-ala@metallacycle | -8.92                     | -0.87                  | 8.04                  | -0.012 | $\text{LP}_{\text{O}}\text{-BD}^*_{\text{N-H}}=5.53$  |
| R-proline          | -9.39                     | 2.37                   | 11.76                 | -      | -                                                     |
| R-pro@metallacycle | -8.75                     | -0.98                  | 7.76                  | -0.036 | $\text{LP}_{\text{O}}\text{-LP}^*_{\text{H}}=16.99$   |
| S-proline          | -9.39                     | 2.37                   | 11.76                 | -      | -                                                     |
| S-pro@metallacycle | -8.44                     | -1.00                  | 7.44                  | -0.291 | $\text{LP}_{\text{O}}\text{-BD}^*_{\text{O-H}}=14.99$ |
| R-serine           | -9.02                     | 2.37                   | 11.40                 | -      | -                                                     |
| R-ser@metallacycle | -8.83                     | -0.86                  | 7.96                  | -0.041 | $\text{LP}_{\text{O}}\text{-BD}^*_{\text{O-H}}=12.71$ |
| S-serine           | -9.07                     | 2.56                   | 11.63                 | -      | -                                                     |
| S-ser@metallacycle | -8.87                     | -0.81                  | 8.06                  | -0.042 | $\text{LP}_{\text{O}}\text{-BD}^*_{\text{O-H}}=12.41$ |
| R-valine           | -8.64                     | 2.33                   | 10.98                 | -      | -                                                     |

|                           |       |       |       |        |                                          |
|---------------------------|-------|-------|-------|--------|------------------------------------------|
| <b>R-val@metallacycle</b> | -8.42 | -0.75 | 7.67  | -0.052 | LP <sub>O</sub> -LP* <sub>H</sub> =24.79 |
| <b>S-valine</b>           | -8.84 | 2.23  | 11.08 | -      | -                                        |
| <b>S-val@metallacycle</b> | -8.81 | -0.70 | 8.10  | -0.036 | LP <sub>O</sub> -LP* <sub>H</sub> =19.67 |

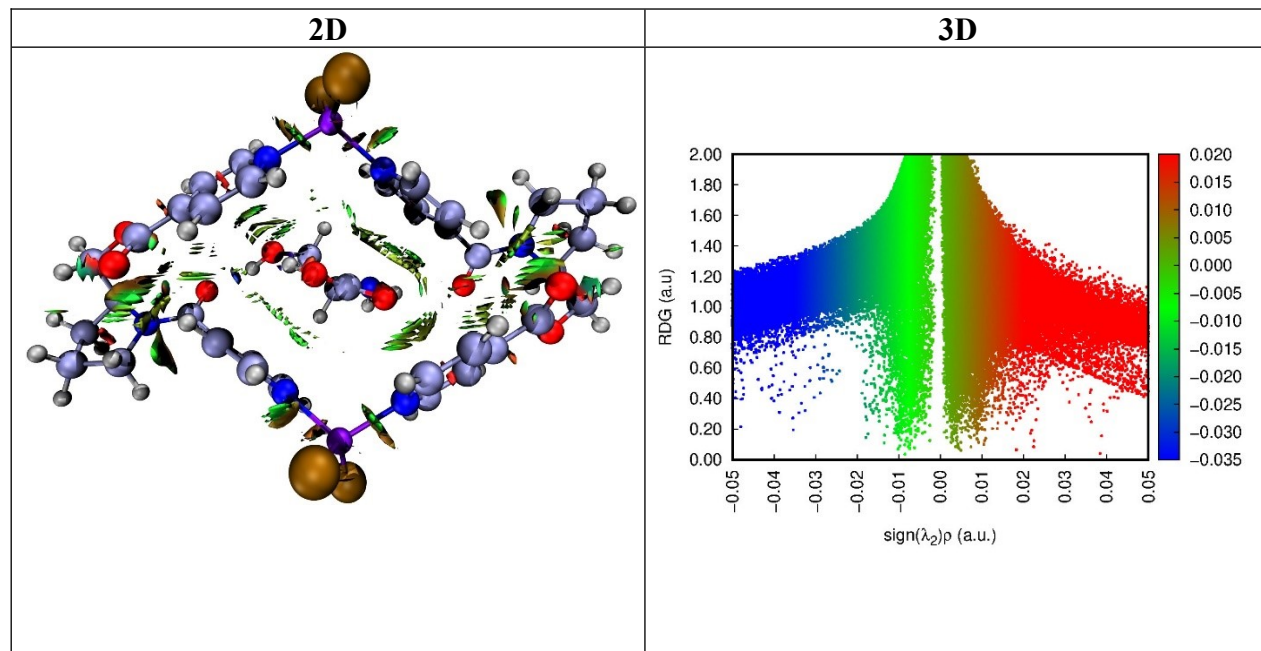

R-ser@metallacycle

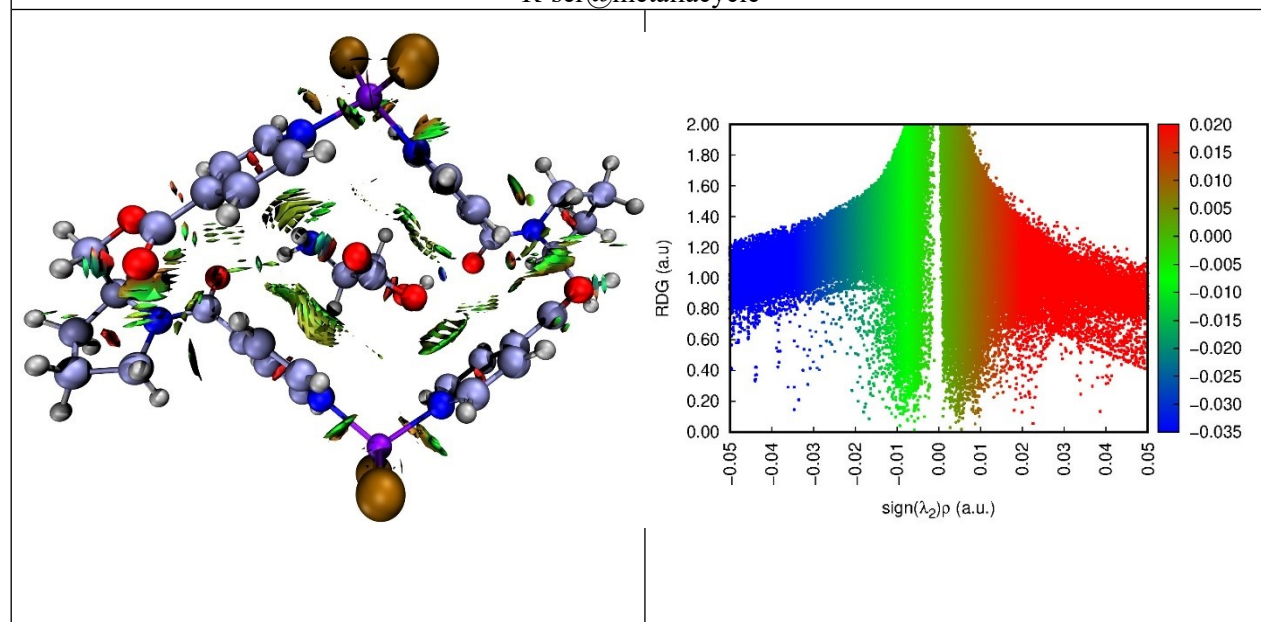

S-ser@metallacycle

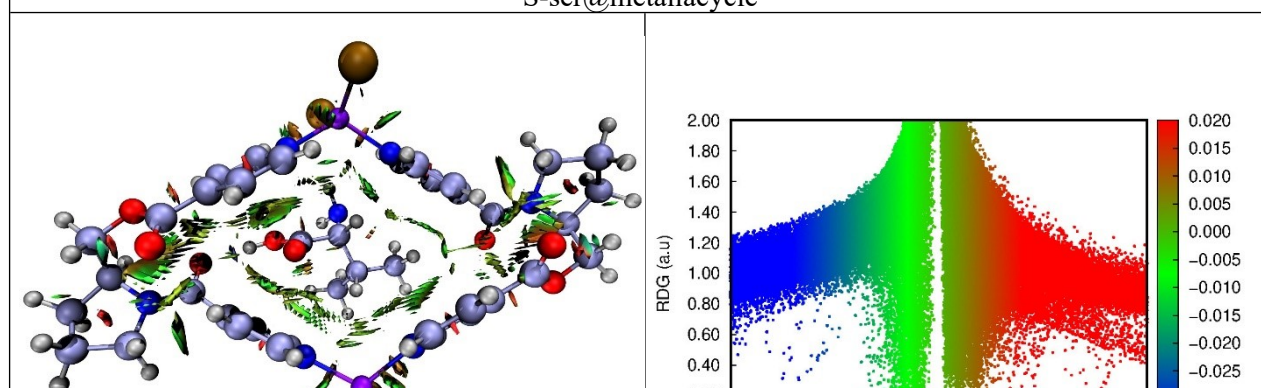

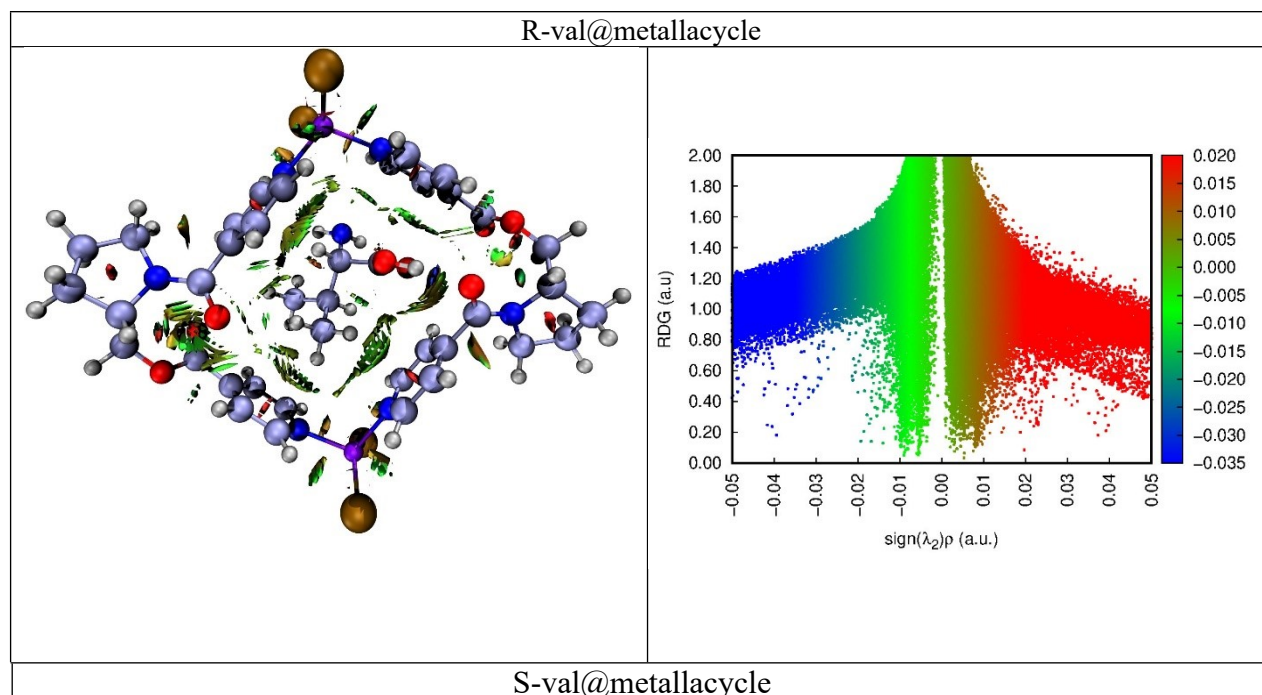

**Figure S3:** Non-covalent interaction index (NCI) analysis for R and S enantiomeric complexes of serine and valine

### 1. Cartesian coordinates of optimized structures

#### R-ala@metallacycle

|    |             |             |             |
|----|-------------|-------------|-------------|
| Zn | -0.44891800 | -4.66392000 | 1.22497500  |
| Zn | 0.52553000  | 4.63383400  | 1.17867500  |
| N  | -1.78714600 | -3.35019400 | 0.35004700  |
| N  | -5.65332400 | -0.54920500 | -1.40103400 |
| N  | -1.37442700 | 3.86435000  | 1.02568900  |
| N  | 1.79264700  | 3.28637800  | 0.28465500  |
| N  | 5.64412000  | 0.50996000  | -1.39913000 |
| N  | 1.41513100  | -3.83558800 | 1.01172700  |
| O  | -3.73087000 | 0.41716000  | -2.13861900 |
| O  | -5.74976500 | 2.29254200  | -0.61689700 |
| O  | -5.46664800 | 0.99144400  | 1.20577500  |
| O  | 3.80631100  | -0.44564100 | -2.33897900 |
| O  | 5.78951000  | -2.27099700 | -0.64335000 |



|   |             |             |             |
|---|-------------|-------------|-------------|
| O | 5.55291900  | -1.01964000 | 1.22268500  |
| C | 4.31478500  | 0.41661500  | -1.62499100 |
| C | 2.50845100  | 2.42951000  | 1.01957200  |
| H | 2.38948000  | 2.51919000  | 2.09492300  |
| C | 3.45112000  | 1.43792900  | -0.93703400 |
| C | -6.38026400 | -1.61974400 | -0.69997000 |
| H | -6.23410700 | -1.52963300 | 0.37931900  |
| H | -6.00454500 | -2.59377200 | -1.02221200 |
| C | -4.32102800 | -0.47555300 | -1.51832300 |
| C | 1.87579100  | 3.23028600  | -1.05049900 |
| H | 1.29273500  | 3.96851700  | -1.59268900 |
| C | 5.14879200  | -1.86754200 | 0.45678300  |
| C | -7.85083800 | -1.40265000 | -1.10704400 |
| H | -8.33831400 | -2.34202500 | -1.37185700 |
| H | -8.41178900 | -0.97081500 | -0.27457400 |
| C | -2.22856100 | -3.55669500 | -0.89660700 |
| H | -1.86007200 | -4.45527000 | -1.38281200 |
| C | -3.09779000 | -2.67796600 | -1.52544000 |
| H | -3.41293900 | -2.86276800 | -2.54604300 |
| C | 3.36050200  | -3.47264400 | -0.31968600 |
| H | 3.90799000  | -3.66868500 | -1.23141400 |
| C | -3.52086200 | -1.54713800 | -0.83114300 |
| C | 6.32465600  | 1.61391300  | -0.70514500 |
| H | 5.90617700  | 2.56951200  | -1.03155400 |
| H | 6.19242500  | 1.53005100  | 0.37601200  |
| C | -2.21452100 | -2.27732500 | 1.02748900  |
| H | -1.84880800 | -2.18396400 | 2.04556200  |
| C | -3.04045300 | 2.34246800  | 1.78754200  |

|   |             |             |             |
|---|-------------|-------------|-------------|
| H | -3.37583700 | 1.61734100  | 2.51916600  |
| C | -6.56123900 | 0.43470800  | -1.98844000 |
| H | -6.08875300 | 0.86340600  | -2.87406400 |
| C | 6.59163200  | -0.42131400 | -2.00262600 |
| H | 6.13538100  | -0.85137700 | -2.89598500 |
| C | 1.88997700  | -2.98724000 | 1.93609400  |
| H | 1.26947900  | -2.85272400 | 2.81695700  |
| C | -5.09788500 | 1.89037500  | 0.48075700  |
| C | -3.83134100 | 2.65252800  | 0.68607500  |
| C | -1.80989700 | 2.96506700  | 1.91575600  |
| H | -1.14378400 | 2.75892400  | 2.74709100  |
| C | 6.95822700  | -1.54728300 | -1.03022900 |
| H | 7.60563200  | -2.27273900 | -1.52606100 |
| H | 7.45511400  | -1.15916000 | -0.13807900 |
| C | 3.36388400  | 1.49849900  | 0.44951700  |
| H | 3.94276500  | 0.82839400  | 1.07671300  |
| C | 3.85003600  | -2.58741500 | 0.63337600  |
| C | 7.80495500  | 1.45782600  | -1.10604000 |
| H | 8.25623900  | 2.41702500  | -1.36464400 |
| H | 8.37722500  | 1.04608700  | -0.27070300 |
| C | 3.10305400  | -2.33853200 | 1.78335200  |
| H | 3.46983200  | -1.65497900 | 2.53911200  |
| C | -6.90848500 | 1.55500800  | -1.00174100 |
| H | -7.56687800 | 2.27565900  | -1.49043400 |
| H | -7.39773200 | 1.15845100  | -0.10911300 |
| C | -3.38917800 | 3.60699600  | -0.22386500 |
| H | -3.98143700 | 3.86976600  | -1.09007200 |
| C | -3.08584500 | -1.35075200 | 0.47646900  |

|    |             |             |             |
|----|-------------|-------------|-------------|
| H  | -3.41032100 | -0.49041900 | 1.04970400  |
| C  | 7.79730500  | 0.47797800  | -2.29084700 |
| H  | 8.73164300  | -0.08190900 | -2.38248700 |
| H  | 7.63084000  | 1.00871000  | -3.23202800 |
| C  | -2.15132700 | 4.19149400  | -0.01304300 |
| H  | -1.74685000 | 4.94471100  | -0.68274000 |
| C  | 2.67942700  | 2.31042200  | -1.70143500 |
| H  | 2.72193200  | 2.28709600  | -2.78426400 |
| C  | -7.79558500 | -0.42180000 | -2.29105900 |
| H  | -8.70757000 | 0.17191200  | -2.39085900 |
| H  | -7.63940400 | -0.95728500 | -3.23127300 |
| C  | 2.13157800  | -4.07387900 | -0.09158200 |
| H  | 1.69559500  | -4.77127900 | -0.79889800 |
| Cl | -0.90308000 | -4.44537600 | 3.38893100  |
| Cl | -0.47685700 | -6.41847300 | -0.13504200 |
| Cl | 1.01960200  | 4.52854200  | 3.33928600  |
| Cl | 0.51698900  | 6.34148400  | -0.25696400 |
| C  | -0.11898500 | -0.60134700 | -1.61980800 |
| H  | -1.00997300 | -1.24253100 | -1.62779000 |
| C  | 0.02843100  | -0.02218400 | -3.02824100 |
| H  | -0.88891200 | 0.46394600  | -3.36884900 |
| H  | 0.84700300  | 0.70169100  | -3.06228700 |
| H  | 0.26358000  | -0.83318800 | -3.72140400 |
| N  | 1.03380300  | -1.39783600 | -1.25165000 |
| H  | 1.86727500  | -1.06451800 | -1.73461500 |
| H  | 1.21130300  | -1.25457400 | -0.26064000 |
| C  | -0.42847300 | 0.48238200  | -0.58413100 |
| O  | 0.23141500  | 0.64860400  | 0.41783800  |

|   |             |            |             |
|---|-------------|------------|-------------|
| O | -1.50226500 | 1.24037900 | -0.80877200 |
| H | -2.10385000 | 0.89496200 | -1.50164700 |

**S-ala@metallacycle**

|    |             |             |             |
|----|-------------|-------------|-------------|
| Zn | 0.50987400  | 4.65206300  | 0.70388100  |
| Zn | -0.46629200 | -4.69940500 | 0.69476100  |
| N  | 1.82590400  | 3.23414100  | 0.00151500  |
| N  | 5.94558000  | 0.48366100  | -0.91833000 |
| N  | 1.38814700  | -3.85195200 | 0.69969800  |
| N  | -1.81601900 | -3.27611900 | 0.02375100  |
| N  | -5.91653100 | -0.50194100 | -0.93558400 |
| N  | -1.39350400 | 3.86158300  | 0.75325000  |
| O  | 4.35785500  | -0.38451400 | -2.30606900 |
| O  | 5.93662600  | -2.28420700 | -0.31777000 |
| O  | 5.52858800  | -1.18534400 | 1.61673000  |
| O  | -4.24645500 | 0.47445700  | -2.14053300 |
| O  | -5.95964000 | 2.28469000  | -0.22716200 |
| O  | -5.46780700 | 1.09523900  | 1.63159000  |
| C  | -4.64563500 | -0.39662700 | -1.36684200 |
| C  | -2.22108600 | -2.28908600 | 0.83209900  |
| H  | -1.78596100 | -2.27811800 | 1.82596300  |
| C  | -3.68453600 | -1.43102700 | -0.84862400 |
| C  | 6.44021700  | 1.53680100  | -0.01851200 |
| H  | 6.05441100  | 1.39293900  | 0.99348100  |
| H  | 6.11453400  | 2.51668800  | -0.37902500 |
| C  | 4.70040900  | 0.41903200  | -1.44653800 |
| C  | -2.32542700 | -3.36287800 | -1.21199900 |
| H  | -1.96634500 | -4.19746800 | -1.80826400 |

|   |             |             |             |
|---|-------------|-------------|-------------|
| C | -5.17409800 | 1.91407200  | 0.78828600  |
| C | 7.97167000  | 1.38305900  | -0.06877500 |
| H | 8.47418600  | 2.35074900  | -0.11081900 |
| H | 8.32399400  | 0.87250000  | 0.83123300  |
| C | 2.28554100  | 3.30822300  | -1.25596500 |
| H | 1.88733400  | 4.12355100  | -1.85338000 |
| C | 3.22257700  | 2.41823000  | -1.75145500 |
| H | 3.56505800  | 2.49824700  | -2.77666000 |
| C | -3.40668900 | 3.27619000  | -0.38716500 |
| H | -3.99460900 | 3.27877100  | -1.29520500 |
| C | 3.71415300  | 1.42269300  | -0.90975000 |
| C | -6.44078900 | -1.59128500 | -0.09574400 |
| H | -6.09408700 | -2.55408400 | -0.48021700 |
| H | -6.09140900 | -1.48138100 | 0.93365100  |
| C | 2.28657100  | 2.26903100  | 0.80801300  |
| H | 1.88838300  | 2.25878100  | 1.81651700  |
| C | 3.13159900  | -2.73166400 | 1.87251600  |
| H | 3.53140900  | -2.34357000 | 2.80122200  |
| C | 7.01571700  | -0.38774000 | -1.38871100 |
| H | 6.76853200  | -0.72209900 | -2.39800700 |
| C | -6.97127300 | 0.40030400  | -1.38898400 |
| H | -6.69338500 | 0.79537100  | -2.36793300 |
| C | -1.84162600 | 3.25679500  | 1.86132600  |
| H | -1.17774100 | 3.29192000  | 2.71929200  |
| C | 5.18300700  | -1.93605000 | 0.73050100  |
| C | 3.84922500  | -2.60677300 | 0.68919900  |
| C | 1.90122900  | -3.36599200 | 1.83533100  |
| H | 1.29752700  | -3.50815800 | 2.72620600  |

|   |             |             |             |
|---|-------------|-------------|-------------|
| C | -7.17641400 | 1.56225400  | -0.41128400 |
| H | -7.88761700 | 2.27692700  | -0.82895300 |
| H | -7.53572600 | 1.20884500  | 0.55775500  |
| C | -3.15712000 | -1.34368700 | 0.43736200  |
| H | -3.47197200 | -0.56366800 | 1.12234500  |
| C | -3.86448600 | 2.63265600  | 0.75922200  |
| C | -7.97007900 | -1.44296200 | -0.20232800 |
| H | -8.46148000 | -2.40973100 | -0.32120500 |
| H | -8.36653200 | -0.98768200 | 0.70872000  |
| C | -3.07350300 | 2.62436200  | 1.90388100  |
| H | -3.41432000 | 2.12710300  | 2.80374200  |
| C | 7.18264000  | -1.60851300 | -0.47615100 |
| H | 7.85981500  | -2.33023800 | -0.93631300 |
| H | 7.56301800  | -1.32166900 | 0.50680100  |
| C | 3.31047600  | -3.09880700 | -0.49693500 |
| H | 3.83767900  | -2.98540500 | -1.43551500 |
| C | 3.23340900  | 1.34411900  | 0.39378000  |
| H | 3.58139300  | 0.57741500  | 1.07714400  |
| C | -8.19568200 | -0.52016300 | -1.41155700 |
| H | -9.13846000 | 0.02979400  | -1.35386600 |
| H | -8.19822800 | -1.09365500 | -2.34236300 |
| C | 2.07169900  | -3.71474200 | -0.44344100 |
| H | 1.60727000  | -4.14093200 | -1.32733700 |
| C | -3.25562400 | -2.45404100 | -1.69078200 |
| H | -3.63817600 | -2.54529200 | -2.70082700 |
| C | 8.24219700  | 0.52654000  | -1.31646200 |
| H | 9.18130300  | -0.02949800 | -1.25240000 |
| H | 8.28153600  | 1.14973400  | -2.21408500 |

|    |             |             |             |
|----|-------------|-------------|-------------|
| C  | -2.16107200 | 3.88171700  | -0.34450200 |
| H  | -1.74750900 | 4.41058800  | -1.19772900 |
| Cl | 1.05223200  | 4.86890300  | 2.84283100  |
| Cl | 0.39350300  | 6.12715400  | -0.96473700 |
| Cl | -1.03369700 | -4.92866300 | 2.82811100  |
| Cl | -0.42773700 | -6.15649200 | -0.99021400 |
| C  | -0.34199200 | -0.21213800 | -1.56851600 |
| H  | -0.89211700 | -1.15498700 | -1.65330900 |
| C  | 0.89352500  | -0.28754800 | -2.45952400 |
| H  | 1.61019100  | -1.01212000 | -2.07039000 |
| H  | 0.61551900  | -0.57079200 | -3.47768500 |
| H  | 1.40006100  | 0.68069700  | -2.49397600 |
| N  | -1.22120300 | 0.91860800  | -1.88007800 |
| H  | -2.17873200 | 0.65434600  | -2.10923700 |
| H  | -0.85136900 | 1.48700000  | -2.63202200 |
| C  | 0.06518200  | -0.11513300 | -0.08645800 |
| O  | 0.81040200  | -0.89750300 | 0.45723700  |
| O  | -0.50219600 | 0.90687400  | 0.54299800  |
| H  | -1.00702300 | 1.35479000  | -0.19124900 |

### **R-pro@metallacycle**

|   |             |             |             |
|---|-------------|-------------|-------------|
| C | -0.25105800 | 0.28075100  | -2.35143000 |
| C | 0.92217700  | -0.48263300 | -1.70765000 |
| C | -0.31271400 | 0.38465200  | 0.08723800  |
| C | -0.79863600 | 1.11979100  | -1.18954000 |
| H | 0.05015200  | 0.88180400  | -3.21333300 |
| H | -1.00190800 | -0.44148000 | -2.68447200 |
| H | 1.81182500  | 0.15271200  | -1.68970500 |

|    |             |             |             |
|----|-------------|-------------|-------------|
| H  | -0.08378400 | -1.58700300 | -0.37334100 |
| H  | -1.13979300 | 0.03378700  | 0.70988300  |
| H  | 0.28771100  | 1.05794100  | 0.70928500  |
| H  | -1.88673800 | 1.19469400  | -1.24709700 |
| H  | -0.39231300 | 2.13517600  | -1.22089500 |
| N  | 0.50733400  | -0.76159300 | -0.33274600 |
| C  | 1.22472400  | -1.79017700 | -2.42744300 |
| O  | 0.41820800  | -2.69487700 | -2.45322500 |
| O  | 2.39771700  | -1.90431800 | -3.03516800 |
| H  | 2.98241300  | -1.13961500 | -2.85429900 |
| Zn | 0.47178500  | 4.62493800  | 1.08232900  |
| Zn | -0.70329000 | -4.45330500 | 1.34644100  |
| N  | 1.87088000  | 3.35032900  | 0.24461300  |
| N  | 5.92243000  | 0.57299700  | -1.03533900 |
| N  | 1.16424100  | -3.61702000 | 1.11338800  |
| N  | -2.00734700 | -3.14674200 | 0.41909800  |
| N  | -5.89000300 | -0.38429300 | -1.26644000 |
| N  | -1.40329800 | 3.78536900  | 0.90233200  |
| O  | 4.26565600  | -0.03811600 | -2.45391900 |
| O  | 5.64261900  | -2.20187400 | -0.44327100 |
| O  | 5.43094100  | -1.02619300 | 1.47131100  |
| O  | -4.04472300 | 0.52798400  | -2.23984000 |
| O  | -5.91644000 | 2.40682700  | -0.54035600 |
| O  | -5.65864700 | 1.17512800  | 1.33619400  |
| C  | -4.56104300 | -0.32023800 | -1.52037200 |
| C  | -2.72593200 | -2.27623300 | 1.14348300  |
| H  | -2.58833000 | -2.33747200 | 2.21948700  |
| C  | -3.70497100 | -1.34922800 | -0.83011000 |



|   |             |             |             |
|---|-------------|-------------|-------------|
| C | 6.56775600  | 1.53013300  | -0.12047800 |
| H | 6.23564700  | 1.36393900  | 0.90570200  |
| H | 6.30823700  | 2.55003800  | -0.41524700 |
| C | 4.67292000  | 0.65883300  | -1.51953000 |
| C | -2.12878900 | -3.14545800 | -0.91553600 |
| H | -1.53799900 | -3.87802000 | -1.45290400 |
| C | -5.25006200 | 1.98884700  | 0.53646500  |
| C | 8.07374300  | 1.23995600  | -0.27473100 |
| H | 8.65562000  | 2.15974000  | -0.35053400 |
| H | 8.43762900  | 0.69702000  | 0.60107900  |
| C | 2.15259200  | 3.41577900  | -1.06415600 |
| H | 1.62393300  | 4.18252000  | -1.62268500 |
| C | 3.07135300  | 2.57117500  | -1.66368400 |
| H | 3.25599500  | 2.62722400  | -2.72984800 |
| C | -3.43368600 | 3.52236400  | -0.32530000 |
| H | -4.02486200 | 3.75844800  | -1.19962600 |
| C | 3.74430400  | 1.64482900  | -0.87010100 |
| C | -6.58127100 | -1.47494300 | -0.56313700 |
| H | -6.20964300 | -2.43965800 | -0.91931000 |
| H | -6.40799500 | -1.41533300 | 0.51402400  |
| C | 2.50866400  | 2.45245600  | 1.00594100  |
| H | 2.24731400  | 2.45820500  | 2.06010200  |
| C | 2.89505500  | -2.19036200 | 1.91830200  |
| H | 3.28252300  | -1.54158800 | 2.69405300  |
| C | 6.87079700  | -0.40473100 | -1.56294800 |
| H | 6.54717000  | -0.69495100 | -2.56318800 |
| C | -6.82423600 | 0.57155100  | -1.85113400 |
| H | -6.38121400 | 0.97816700  | -2.76216600 |

|   |             |             |             |
|---|-------------|-------------|-------------|
| C | -1.86113100 | 2.94108200  | 1.83677800  |
| H | -1.20184800 | 2.76745300  | 2.68177700  |
| C | 4.98870500  | -1.80759700 | 0.65520100  |
| C | 3.64393100  | -2.44690300 | 0.77371200  |
| C | 1.65642800  | -2.79379200 | 2.04777400  |
| H | 1.03251000  | -2.64810000 | 2.92432500  |
| C | -7.12318900 | 1.71965000  | -0.88077200 |
| H | -7.76009400 | 2.46291500  | -1.36341400 |
| H | -7.60310100 | 1.35899300  | 0.03189000  |
| C | -3.59822600 | -1.37246100 | 0.56079900  |
| H | -4.17422100 | -0.68993000 | 1.17740200  |
| C | -3.90856500 | 2.64418100  | 0.64399400  |
| C | -8.06853900 | -1.26219000 | -0.90569600 |
| H | -8.56789500 | -2.20368500 | -1.13973200 |
| H | -8.58984500 | -0.82305300 | -0.05100100 |
| C | -3.10988200 | 2.34799400  | 1.74463900  |
| H | -3.46575700 | 1.67492000  | 2.51516900  |
| C | 6.93957400  | -1.64581100 | -0.66377800 |
| H | 7.51678500  | -2.42710500 | -1.16104900 |
| H | 7.39491000  | -1.40950500 | 0.30045900  |
| C | 3.12864100  | -3.29331400 | -0.20301600 |
| H | 3.67196000  | -3.50194800 | -1.11481100 |
| C | 3.45720400  | 1.58226200  | 0.49065000  |
| H | 3.94417100  | 0.85958700  | 1.13657900  |
| C | -8.06759300 | -0.28868200 | -2.09525400 |
| H | -8.98585200 | 0.30081700  | -2.16003700 |
| H | -7.94880300 | -0.82898400 | -3.03818800 |
| C | 1.88093400  | -3.86244200 | 0.00993800  |

|    |             |             |             |
|----|-------------|-------------|-------------|
| H  | 1.43316700  | -4.53710700 | -0.71207200 |
| C  | -2.94750400 | -2.24327200 | -1.57887300 |
| H  | -2.98669800 | -2.24263400 | -2.66153500 |
| C  | 8.19057700  | 0.37088800  | -1.53817900 |
| H  | 9.06461700  | -0.28505500 | -1.51934100 |
| H  | 8.25830900  | 0.99364200  | -2.43409600 |
| C  | -2.17528700 | 4.07642100  | -0.15302300 |
| H  | -1.75610100 | 4.78265700  | -0.86319200 |
| Cl | 0.90563200  | 4.48674600  | 3.25367000  |
| Cl | 0.43632500  | 6.32084900  | -0.35077100 |
| Cl | -1.15622400 | -4.19356700 | 3.51164200  |
| Cl | -0.70229500 | -6.24566200 | 0.05313100  |

### **S-pro@metallacycle**

|   |             |             |             |
|---|-------------|-------------|-------------|
| C | -0.74557000 | -0.35585600 | 2.10976100  |
| C | 0.40443600  | 0.52790300  | 0.14078800  |
| C | 0.89472900  | 1.15589600  | 1.47046800  |
| H | 1.18068600  | -0.45147100 | 2.70181000  |
| H | -1.59132800 | 0.29850100  | 2.34646400  |
| H | -0.29097300 | -1.52492500 | 0.32088300  |
| H | 1.23044700  | 0.05126300  | -0.39327000 |
| H | -0.01803500 | 1.28015600  | -0.53037800 |
| H | 1.97589700  | 1.29622100  | 1.50974600  |
| H | 0.42383400  | 2.13814000  | 1.61089000  |
| C | -0.95375900 | -1.70609100 | 2.77228500  |
| O | -0.03396200 | -2.42727400 | 3.08631800  |
| O | -2.21815500 | -2.09850200 | 2.91922500  |
| H | -2.84138800 | -1.39390300 | 2.65215000  |

|    |             |             |             |
|----|-------------|-------------|-------------|
| N  | 0.48279100  | 0.27199600  | 2.55464800  |
| C  | -0.64390700 | -0.52066900 | 0.56338000  |
| H  | -1.61331500 | -0.38765200 | 0.07570600  |
| Zn | -0.39119100 | 4.61646400  | -1.04789400 |
| Zn | 0.56146700  | -4.40891300 | -1.36074700 |
| N  | -1.81105400 | 3.32542800  | -0.26433300 |
| N  | -5.88753200 | 0.60934500  | 1.04359700  |
| N  | -1.30526200 | -3.53492100 | -1.14774400 |
| N  | 1.87752100  | -3.11103500 | -0.45833400 |
| N  | 5.90075400  | -0.50653200 | 1.17022000  |
| N  | 1.47260900  | 3.74368400  | -0.90618100 |
| O  | -4.14964000 | -0.31093700 | 2.16613300  |
| O  | -5.82695600 | -2.15178700 | 0.28030500  |
| O  | -5.53232800 | -0.88463800 | -1.56542400 |
| O  | 4.10757800  | 0.44669700  | 2.19720300  |
| O  | 5.98297700  | 2.27701000  | 0.45771100  |
| O  | 5.68218800  | 1.07496500  | -1.43198600 |
| C  | 4.57979500  | -0.40633500 | 1.45306400  |
| C  | 2.66530000  | -2.31350800 | -1.19433700 |
| H  | 2.54685800  | -2.40070400 | -2.27059900 |
| C  | 3.67110700  | -1.39285800 | 0.76954600  |
| C  | -6.52026000 | 1.69407900  | 0.27469100  |
| H  | -6.24834200 | 1.62629400  | -0.78055900 |
| H  | -6.18638500 | 2.66070400  | 0.66089000  |
| C  | -4.59310300 | 0.54511800  | 1.39600000  |
| C  | 1.96399100  | -3.06249800 | 0.87750300  |
| H  | 1.31299200  | -3.72773200 | 1.43417300  |
| C  | 5.29613200  | 1.88295700  | -0.61532200 |

|   |             |             |             |
|---|-------------|-------------|-------------|
| C | -8.02988100 | 1.47095100  | 0.48377800  |
| H | -8.55433500 | 2.40993100  | 0.66660900  |
| H | -8.46757100 | 1.02380800  | -0.41227500 |
| C | -2.04798100 | 3.30243900  | 1.05340300  |
| H | -1.49038700 | 4.02021700  | 1.64761500  |
| C | -2.95770100 | 2.42750400  | 1.62563400  |
| H | -3.10098500 | 2.41459000  | 2.69973700  |
| C | 3.48540100  | 3.37640500  | 0.32442100  |
| H | 4.06549500  | 3.54315900  | 1.22190300  |
| C | -3.66841800 | 1.56645600  | 0.79486900  |
| C | 6.55153900  | -1.61716700 | 0.45914600  |
| H | 6.15888500  | -2.57060600 | 0.82315600  |
| H | 6.36573600  | -1.55566400 | -0.61563500 |
| C | -2.49268800 | 2.49596600  | -1.06557400 |
| H | -2.26683000 | 2.57571900  | -2.12515600 |
| C | -3.04934100 | -2.17234700 | -2.03388200 |
| H | -3.44231000 | -1.56923400 | -2.84337600 |
| C | -6.86658500 | -0.35133700 | 1.54996000  |
| H | -6.50478900 | -0.74693100 | 2.50026400  |
| C | 6.86976300  | 0.41948800  | 1.74713100  |
| H | 6.45108800  | 0.83230700  | 2.66675400  |
| C | 1.93532400  | 2.96047200  | -1.89113000 |
| H | 1.28464000  | 2.85124900  | -2.75336300 |
| C | -5.13609100 | -1.71586600 | -0.77595300 |
| C | -3.79633000 | -2.37098500 | -0.87519200 |
| C | -1.80727700 | -2.77680200 | -2.13218800 |
| H | -1.18681200 | -2.68405800 | -3.01867700 |
| C | 7.18085000  | 1.56456700  | 0.77707600  |

|   |             |             |             |
|---|-------------|-------------|-------------|
| H | 7.84026900  | 2.29242900  | 1.25283800  |
| H | 7.63888200  | 1.19732900  | -0.14420400 |
| C | 3.58407000  | -1.44965500 | -0.62183900 |
| H | 4.20641300  | -0.81875100 | -1.24827700 |
| C | 3.96335700  | 2.56027000  | -0.69593500 |
| C | 8.04904200  | -1.44452800 | 0.77829000  |
| H | 8.52699900  | -2.39955500 | 1.00201900  |
| H | 8.56754100  | -1.01688000 | -0.08394800 |
| C | 3.17529900  | 2.34715700  | -1.82355200 |
| H | 3.53289500  | 1.72020100  | -2.63123500 |
| C | -7.06951800 | -1.50620500 | 0.56251400  |
| H | -7.70600900 | -2.26984700 | 1.01227500  |
| H | -7.51449900 | -1.15813500 | -0.37229200 |
| C | -3.27173300 | -3.15135000 | 0.15033500  |
| H | -3.81209900 | -3.30833500 | 1.07382400  |
| C | -3.43841100 | 1.60665000  | -0.57924000 |
| H | -3.97042700 | 0.94630300  | -1.25686100 |
| C | 8.09295100  | -0.47430200 | 1.96938100  |
| H | 9.02751800  | 0.09035600  | 2.02056500  |
| H | 7.97477200  | -1.01335900 | 2.91307900  |
| C | -2.01765800 | -3.71825400 | -0.02910500 |
| H | -1.56302800 | -4.34590600 | 0.73148600  |
| C | 2.83169200  | -2.20010100 | 1.52987700  |
| H | 2.84473300  | -2.17098600 | 2.61286700  |
| C | -8.13001400 | 0.50440300  | 1.67504200  |
| H | -9.04568700 | -0.09193400 | 1.65917700  |
| H | -8.10217600 | 1.05029500  | 2.62175800  |
| C | 2.23348400  | 3.95320800  | 0.17592800  |

|    |             |             |             |
|----|-------------|-------------|-------------|
| H  | 1.81297600  | 4.61228500  | 0.92912900  |
| Cl | -0.83651400 | 4.57540500  | -3.22237100 |
| Cl | -0.33784000 | 6.24534000  | 0.45726000  |
| Cl | 0.99764100  | -4.21784300 | -3.53295600 |
| Cl | 0.47584600  | -6.16010600 | -0.01684800 |

### **R-ser@metallacycle**

|    |             |             |             |
|----|-------------|-------------|-------------|
| Zn | -0.27781700 | -4.38909400 | 0.90408000  |
| Zn | 0.34561300  | 4.33511000  | 0.98665300  |
| N  | -1.70318300 | -3.08573600 | 0.14473800  |
| N  | -6.00690400 | -0.67798600 | -1.01739300 |
| N  | -1.52900300 | 3.47298100  | 0.91108500  |
| N  | 1.76519100  | 3.06935700  | 0.22101800  |
| N  | 5.99694700  | 0.59497200  | -1.02060400 |
| N  | 1.57451200  | -3.53584900 | 0.86329300  |
| O  | -4.39502000 | 0.29558600  | -2.28633700 |
| O  | -6.12234600 | 2.05412600  | -0.21502300 |
| O  | -5.70112100 | 0.79403800  | 1.61111300  |
| O  | 4.34113700  | -0.40275900 | -2.22446500 |
| O  | 6.15812100  | -2.13115400 | -0.26203800 |
| O  | 5.79111900  | -0.93755000 | 1.62253000  |
| C  | 4.71139300  | 0.45309300  | -1.42649900 |
| C  | 2.48089800  | 2.27328500  | 1.02601500  |
| H  | 2.24380800  | 2.33567400  | 2.08343000  |
| C  | 3.71825200  | 1.41003000  | -0.82629600 |
| C  | -6.53035400 | -1.78867100 | -0.20377800 |
| H  | -6.24741900 | -1.66336400 | 0.84319900  |
| H  | -6.12056000 | -2.73412500 | -0.56737100 |

|   |             |             |             |
|---|-------------|-------------|-------------|
| C | -4.74158800 | -0.54667300 | -1.44986800 |
| C | 2.00907900  | 3.05198800  | -1.09726700 |
| H | 1.42724500  | 3.74828000  | -1.69393500 |
| C | 5.42607100  | -1.73271800 | 0.78370900  |
| C | -8.05876300 | -1.70196700 | -0.38613800 |
| H | -8.49897600 | -2.68373100 | -0.56658500 |
| H | -8.51923800 | -1.30238700 | 0.52078700  |
| C | -1.97091200 | -3.07602900 | -1.16783700 |
| H | -1.38353000 | -3.76062200 | -1.77289300 |
| C | -2.95373600 | -2.26823500 | -1.71481500 |
| H | -3.13188000 | -2.26693500 | -2.78395500 |
| C | 3.59333200  | -3.06627700 | -0.31777600 |
| H | 4.17261400  | -3.13407100 | -1.22832700 |
| C | -3.71359000 | -1.47113300 | -0.86209000 |
| C | 6.53278700  | 1.72227800  | -0.24245700 |
| H | 6.11435300  | 2.66118300  | -0.61486900 |
| H | 6.27386500  | 1.62317800  | 0.81417800  |
| C | -2.41562200 | -2.30332900 | 0.96237000  |
| H | -2.15860000 | -2.36372600 | 2.01530100  |
| C | -3.13682200 | 1.97881900  | 1.83947200  |
| H | -3.40907800 | 1.25818600  | 2.60077500  |
| C | -7.07352600 | 0.20675700  | -1.48100500 |
| H | -6.77599100 | 0.63663800  | -2.43845300 |
| C | 7.05570200  | -0.27088100 | -1.52647800 |
| H | 6.72910100  | -0.69766100 | -2.47640900 |
| C | 2.04228600  | -2.87137300 | 1.92782500  |
| H | 1.38725200  | -2.84014700 | 2.79256900  |
| C | -5.36936200 | 1.64283800  | 0.81125100  |



|   |             |             |             |
|---|-------------|-------------|-------------|
| C | -4.04344700 | 2.33051700  | 0.84076600  |
| C | -1.88792400 | 2.57463200  | 1.83946500  |
| H | -1.14751100 | 2.35616300  | 2.60156500  |
| C | 7.35439300  | -1.40490600 | -0.53788800 |
| H | 8.04702200  | -2.12123700 | -0.98313000 |
| H | 7.76954600  | -1.02298200 | 0.39767800  |
| C | 3.47900000  | 1.44206900  | 0.54446900  |
| H | 4.03793700  | 0.81057200  | 1.22665900  |
| C | 4.08332000  | -2.38724100 | 0.79264300  |
| C | 8.05679500  | 1.63902100  | -0.45552800 |
| H | 8.49403000  | 2.62259100  | -0.63489700 |
| H | 8.53600700  | 1.22930700  | 0.43744400  |
| C | 3.29478500  | -2.28204200 | 1.93312100  |
| H | 3.65809700  | -1.75139100 | 2.80465100  |
| C | -7.32764100 | 1.33361800  | -0.47068000 |
| H | -8.02699200 | 2.05767000  | -0.89174800 |
| H | -7.72271400 | 0.94456900  | 0.47034500  |
| C | -3.67575900 | 3.27437800  | -0.11014300 |
| H | -4.35065900 | 3.56113300  | -0.90503100 |
| C | -3.44284300 | -1.49159700 | 0.50289000  |
| H | -4.01044100 | -0.88161700 | 1.19752000  |
| C | 8.24133600  | 0.68972500  | -1.65041100 |
| H | 9.20616600  | 0.17579900  | -1.63697900 |
| H | 8.16455700  | 1.23502700  | -2.59495200 |
| C | -2.40322800 | 3.82155100  | -0.03811900 |
| H | -2.05371600 | 4.56309700  | -0.74969100 |
| C | 2.95742600  | 2.21913600  | -1.66425200 |
| H | 3.08346100  | 2.18492700  | -2.73862500 |

|    |             |             |             |
|----|-------------|-------------|-------------|
| C  | -8.27110400 | -0.74273600 | -1.56949500 |
| H  | -9.22899900 | -0.21869800 | -1.52093500 |
| H  | -8.23207700 | -1.28224900 | -2.51945400 |
| C  | 2.33125900  | -3.62846000 | -0.23732400 |
| H  | 1.90263800  | -4.19187200 | -1.05993500 |
| Cl | -0.83378900 | -4.51548200 | 3.05096400  |
| Cl | -0.21040500 | -5.93998000 | -0.69895900 |
| Cl | 0.77927800  | 4.38136200  | 3.16631900  |
| Cl | 0.21363700  | 5.96128200  | -0.53294500 |
| C  | 0.03516600  | -0.08340400 | -2.18059100 |
| N  | 1.23472000  | -0.08470000 | -2.99164800 |
| H  | 2.03827900  | -0.41193300 | -2.45746400 |
| H  | 1.13376200  | -0.68464900 | -3.79971000 |
| C  | 0.38891800  | -0.19778500 | -0.69075600 |
| O  | 1.43708200  | -0.66320300 | -0.30971000 |
| O  | -0.55083400 | 0.18965100  | 0.16996700  |
| H  | -1.29132100 | 0.60702200  | -0.33709200 |
| C  | -0.79133200 | 1.17551000  | -2.50302400 |
| H  | -0.16885600 | 2.05533600  | -2.32329600 |
| H  | -1.05197300 | 1.16582100  | -3.56613100 |
| O  | -1.94976000 | 1.29842000  | -1.69259000 |
| H  | -2.73911000 | 0.88405600  | -2.09447300 |
| H  | -0.61307000 | -0.95665800 | -2.36508000 |

**S-ser@metallacycle**

|   |             |             |             |
|---|-------------|-------------|-------------|
| C | -0.44630300 | -0.03912400 | -1.28379500 |
| N | -1.36593200 | 1.05833800  | -1.47892000 |
| H | -2.15220900 | 0.79685500  | -2.06785300 |

|    |             |             |             |
|----|-------------|-------------|-------------|
| H  | -1.74349400 | 1.30873100  | -0.57081000 |
| C  | 0.05741000  | -0.03406700 | 0.16158500  |
| O  | -0.49218500 | 0.57733300  | 1.05120400  |
| O  | 1.12047300  | -0.79449500 | 0.39862600  |
| H  | 1.46474300  | -1.10954200 | -0.47682200 |
| C  | 0.69410500  | 0.05329800  | -2.30513900 |
| H  | 0.25954100  | 0.03434800  | -3.31087700 |
| H  | 1.20198900  | 1.01316600  | -2.17601500 |
| O  | 1.58853600  | -1.04078000 | -2.12911400 |
| H  | 2.50192700  | -0.75729600 | -2.33660500 |
| H  | -0.90546100 | -1.03339700 | -1.41178800 |
| Zn | -0.46837200 | -4.65175700 | 0.82179000  |
| Zn | 0.39130100  | 4.65904200  | 0.81812900  |
| N  | -1.79672200 | -3.25024000 | 0.07522300  |
| N  | -5.92619700 | -0.56386700 | -1.03229300 |
| N  | -1.48624000 | 3.84153200  | 0.76914900  |
| N  | 1.78070200  | 3.30695400  | 0.09954700  |
| N  | 5.90035100  | 0.58380200  | -0.99739700 |
| N  | 1.43062600  | -3.86303200 | 0.79555900  |
| O  | -4.27768300 | 0.34546800  | -2.31297000 |
| O  | -6.00799800 | 2.23424100  | -0.40502900 |
| O  | -5.58747800 | 1.07626200  | 1.48854800  |
| O  | 4.22892300  | -0.31258500 | -2.24523800 |
| O  | 5.93140400  | -2.22568400 | -0.39304300 |
| O  | 5.54602800  | -1.11716400 | 1.53841100  |
| C  | 4.62936200  | 0.52114000  | -1.42417400 |
| C  | 2.26504600  | 2.34278800  | 0.89126700  |
| H  | 1.87080200  | 2.31192000  | 1.90134800  |

|   |             |             |             |
|---|-------------|-------------|-------------|
| C | 3.67788300  | 1.53512900  | -0.85516800 |
| C | -6.45602000 | -1.62930400 | -0.16739700 |
| H | -6.13343500 | -1.48115600 | 0.86582900  |
| H | -6.09099000 | -2.60102700 | -0.51095800 |
| C | -4.65683400 | -0.47775800 | -1.48383000 |
| C | 2.23217600  | 3.41416400  | -1.15697300 |
| H | 1.81339800  | 4.23009900  | -1.73890600 |
| C | 5.20437000  | -1.90336700 | 0.68243500  |
| C | -7.98468100 | -1.50211300 | -0.30990200 |
| H | -8.46392100 | -2.47777200 | -0.40446100 |
| H | -8.40315000 | -1.01968800 | 0.57710700  |
| C | -2.20966400 | -3.33349900 | -1.19787500 |
| H | -1.77699300 | -4.14228200 | -1.77971500 |
| C | -3.13847500 | -2.45474200 | -1.73137300 |
| H | -3.43456500 | -2.53800300 | -2.77051100 |
| C | 3.36734300  | -3.21950800 | -0.44127000 |
| H | 3.89377500  | -3.17932000 | -1.38573800 |
| C | -3.68243700 | -1.47155700 | -0.90781300 |
| C | 6.45451600  | 1.63458200  | -0.12663400 |
| H | 6.10786400  | 2.61395400  | -0.46618600 |
| H | 6.12628100  | 1.48632400  | 0.90444300  |
| C | -2.30577400 | -2.29387500 | 0.86409000  |
| H | -1.94465100 | -2.27822300 | 1.88736000  |
| C | -3.15011700 | 2.48049400  | 1.79544000  |
| H | -3.47649600 | 1.88457800  | 2.63853000  |
| C | -6.98009100 | 0.30831800  | -1.54054800 |
| H | -6.68392400 | 0.66789600  | -2.52763500 |
| C | 6.93680000  | -0.30813300 | -1.51289800 |

|   |             |             |             |
|---|-------------|-------------|-------------|
| H | 6.63283600  | -0.65587100 | -2.50168200 |
| C | 1.94975500  | -3.31049800 | 1.89898900  |
| H | 1.33947800  | -3.38167200 | 2.79405900  |
| C | -5.26273400 | 1.88708800  | 0.64818800  |
| C | -3.95712000 | 2.61433800  | 0.67071800  |
| C | -1.91784000 | 3.11295200  | 1.80559400  |
| H | -1.24503200 | 3.04649400  | 2.65372600  |
| C | 7.15178200  | -1.51383300 | -0.59218900 |
| H | 7.83632500  | -2.22009500 | -1.06516900 |
| H | 7.55122400  | -1.20721300 | 0.37699000  |
| C | 3.22304000  | 1.43763500  | 0.45568000  |
| H | 3.58649400  | 0.66413800  | 1.12308700  |
| C | 3.89944100  | -2.63067100 | 0.70341600  |
| C | 7.97924700  | 1.47506100  | -0.27218900 |
| H | 8.47854200  | 2.44095900  | -0.36131700 |
| H | 8.38896400  | 0.97801500  | 0.61069300  |
| C | 3.18427000  | -2.68151800 | 1.89485700  |
| H | 3.57939300  | -2.22367800 | 2.79323000  |
| C | -7.21785600 | 1.50622300  | -0.61369600 |
| H | -7.90957700 | 2.20695600  | -1.08442000 |
| H | -7.61670800 | 1.18837500  | 0.35217900  |
| C | -3.51422300 | 3.38456600  | -0.40245400 |
| H | -4.11179800 | 3.49067000  | -1.29775300 |
| C | -3.25653700 | -1.38867500 | 0.41536400  |
| H | -3.65178000 | -0.63384000 | 1.08680300  |
| C | 8.16947000  | 0.60138800  | -1.52311800 |
| H | 9.10720000  | 0.04015500  | -1.50827600 |
| H | 8.15890200  | 1.21299800  | -2.42927900 |

|    |             |             |             |
|----|-------------|-------------|-------------|
| C  | -2.26682600 | 3.98141600  | -0.31097000 |
| H  | -1.86132300 | 4.59193400  | -1.11107400 |
| C  | 3.17602500  | 2.54306000  | -1.67617000 |
| H  | 3.50248500  | 2.64239300  | -2.70496300 |
| C  | -8.19593400 | -0.62349400 | -1.55404100 |
| H  | -9.14486100 | -0.08126800 | -1.53236700 |
| H  | -8.17592600 | -1.22847500 | -2.46452900 |
| C  | 2.12539900  | -3.82749500 | -0.34911800 |
| H  | 1.65976800  | -4.30883100 | -1.20298600 |
| Cl | -0.99920700 | -4.76618800 | 2.97168900  |
| Cl | -0.41369000 | -6.19204900 | -0.78408600 |
| Cl | 0.90151600  | 4.75890800  | 2.97908200  |
| Cl | 0.35564100  | 6.23530000  | -0.75520400 |

### **R-val@metallacycle**

|   |             |             |             |
|---|-------------|-------------|-------------|
| C | 1.43951800  | -0.63765000 | -1.41950900 |
| O | 2.38178800  | -0.95166400 | -2.30660700 |
| O | 1.67457400  | -0.30463500 | -0.27352100 |
| H | 3.27938400  | -0.81905900 | -1.91744200 |
| C | 0.02577900  | -0.70139400 | -1.98433100 |
| C | -0.41744300 | 0.72905000  | -2.39227600 |
| H | -0.18084100 | 1.37646000  | -1.53639800 |
| C | 0.33723100  | 1.25633800  | -3.61600200 |
| H | 0.11524000  | 2.31799900  | -3.76161500 |
| H | 1.42058500  | 1.14280300  | -3.51394800 |
| H | 0.02772000  | 0.72452300  | -4.52201900 |
| C | -1.92496900 | 0.76619500  | -2.63209800 |
| H | -2.48531200 | 0.55777000  | -1.71734300 |

|    |             |             |             |
|----|-------------|-------------|-------------|
| H  | -2.23761600 | 1.74805400  | -3.00028900 |
| H  | -2.20648600 | 0.01713200  | -3.37674000 |
| N  | -0.18459400 | -1.65903300 | -3.05495200 |
| H  | 0.47204200  | -1.48157800 | -3.80840900 |
| H  | 0.00739100  | -2.60538100 | -2.73265400 |
| H  | -0.59831500 | -0.99382200 | -1.13378800 |
| Zn | 0.35636100  | 4.32836200  | 0.16603100  |
| Zn | -0.48728000 | -4.25221100 | 0.20764100  |
| N  | 1.97586200  | 3.09553500  | -0.09662800 |
| N  | 6.38193500  | 0.51176500  | -0.04730300 |
| N  | 1.32803500  | -3.37715400 | 0.63448400  |
| N  | -2.03113200 | -2.94602100 | -0.17296700 |
| N  | -6.45997800 | -0.47507300 | -0.05330300 |
| N  | -1.41511000 | 3.33455600  | 0.54305600  |
| O  | 4.96355300  | -0.53113000 | -1.47543300 |
| O  | 6.10980700  | -2.20191100 | 0.85657300  |
| O  | 5.26395100  | -0.87647400 | 2.47960400  |
| O  | -5.27895400 | 0.44256300  | -1.77076400 |
| O  | -6.20956000 | 2.21198400  | 0.67520300  |
| O  | -5.44155600 | 1.02831900  | 2.44390300  |
| C  | -5.37814300 | -0.37899600 | -0.86725800 |
| C  | -2.53297300 | -2.20916300 | 0.82820300  |
| H  | -2.04812400 | -2.31950000 | 1.79247700  |
| C  | -4.23849000 | -1.32208200 | -0.58915000 |
| C  | 6.82045400  | 1.66626800  | 0.75376100  |
| H  | 6.30748500  | 1.68627300  | 1.71725100  |
| H  | 6.59167900  | 2.59216500  | 0.21997300  |
| C  | 5.21194000  | 0.40125500  | -0.70010500 |

|   |             |             |             |
|---|-------------|-------------|-------------|
| C | -2.60879600 | -2.88111400 | -1.38097800 |
| H | -2.16055800 | -3.49234500 | -2.15614000 |
| C | -5.26012100 | 1.77209100  | 1.50383300  |
| C | 8.33518000  | 1.44892300  | 0.93377900  |
| H | 8.89502100  | 2.37410300  | 0.78907900  |
| H | 8.54341900  | 1.09913200  | 1.94815600  |
| C | 2.46182100  | 2.87219400  | -1.32462100 |
| H | 1.94559300  | 3.37704800  | -2.13541700 |
| C | 3.55269600  | 2.05018100  | -1.54489000 |
| H | 3.89996100  | 1.86136400  | -2.55374200 |
| C | -3.63180300 | 2.76959500  | -0.14732800 |
| H | -4.37119800 | 2.71194300  | -0.93602100 |
| C | 4.15966500  | 1.43926600  | -0.45216300 |
| C | -6.76582600 | -1.59030500 | 0.85648200  |
| H | -6.56027900 | -2.54220200 | 0.35847600  |
| H | -6.15980800 | -1.53624900 | 1.76326900  |
| C | 2.56862000  | 2.51967200  | 0.95549700  |
| H | 2.14673700  | 2.75723600  | 1.92661600  |
| C | 2.74473200  | -2.20672700 | 2.15597700  |
| H | 2.87380900  | -1.68794100 | 3.09774300  |
| C | 7.44417400  | -0.48120000 | -0.20351700 |
| H | 7.32388900  | -0.96998200 | -1.17171000 |
| C | -7.59192200 | 0.43015300  | -0.21662000 |
| H | -7.57833400 | 0.81862700  | -1.23618500 |
| C | -1.68872000 | 2.88594700  | 1.77726500  |
| H | -0.89752200 | 3.00116400  | 2.51070200  |
| C | 5.12325000  | -1.72001100 | 1.62093600  |
| C | 3.80967100  | -2.34048200 | 1.27172300  |



|   |             |             |             |
|---|-------------|-------------|-------------|
| C | 1.52342800  | -2.75428000 | 1.80427500  |
| H | 0.67262700  | -2.72342100 | 2.47625800  |
| C | -7.49663600 | 1.59995500  | 0.77334300  |
| H | -8.21980300 | 2.37513900  | 0.51533200  |
| H | -7.65999800 | 1.26968500  | 1.80155500  |
| C | -3.63111600 | -1.38343700 | 0.66517800  |
| H | -3.99732600 | -0.79541000 | 1.50012700  |
| C | -3.91658200 | 2.31815500  | 1.13695100  |
| C | -8.26120000 | -1.41320700 | 1.17802100  |
| H | -8.78733900 | -2.36904400 | 1.19491300  |
| H | -8.37592100 | -0.96084100 | 2.16662300  |
| C | -2.92215500 | 2.35551300  | 2.11185400  |
| H | -3.12341900 | 1.99880200  | 3.11469900  |
| C | 7.37090500  | -1.53617900 | 0.90515600  |
| H | 8.12484200  | -2.30719200 | 0.73713700  |
| H | 7.51070900  | -1.09177300 | 1.89341800  |
| C | 3.61519100  | -3.00493600 | 0.06585800  |
| H | 4.41923200  | -3.10442400 | -0.65069300 |
| C | 3.66397900  | 1.68303800  | 0.82414500  |
| H | 4.07639900  | 1.18403900  | 1.69406100  |
| C | -8.79245900 | -0.46874400 | 0.08867300  |
| H | -9.67230300 | 0.09497900  | 0.41008200  |
| H | -9.06226100 | -1.02712600 | -0.81181900 |
| C | 2.35195700  | -3.49697100 | -0.21988200 |
| H | 2.13327500  | -4.00991800 | -1.15103800 |
| C | -3.70583200 | -2.07315400 | -1.63052600 |
| H | -4.12690100 | -2.01634500 | -2.62656900 |
| C | 8.71060500  | 0.37164900  | -0.09582400 |

|    |             |             |             |
|----|-------------|-------------|-------------|
| H  | 9.58641500  | -0.21027100 | 0.20192600  |
| H  | 8.92279400  | 0.82233500  | -1.06895000 |
| C  | -2.36062500 | 3.26520100  | -0.40180900 |
| H  | -2.07942600 | 3.64667800  | -1.37827400 |
| Cl | 0.78967600  | 5.23392400  | 2.15612000  |
| Cl | 0.03803100  | 5.21790100  | -1.85136700 |
| Cl | -1.07356000 | -5.05445800 | 2.19671400  |
| Cl | -0.13787800 | -5.20373500 | -1.78342700 |

### **S-val@metallacycle**

|   |             |             |             |
|---|-------------|-------------|-------------|
| C | 1.51806100  | -0.66093500 | 0.23816200  |
| O | 1.43939900  | -0.74507300 | -1.08181900 |
| O | 2.51465000  | -0.30007100 | 0.83906000  |
| H | 2.27930700  | -0.39412600 | -1.47269900 |
| C | 0.22637000  | -0.99211800 | 0.96236300  |
| C | -0.41987600 | 0.34791100  | 1.39764300  |
| H | 0.34918900  | 0.89409200  | 1.96255800  |
| C | -0.81780800 | 1.17200600  | 0.17203000  |
| H | -1.18793000 | 2.14908700  | 0.48321900  |
| H | 0.02201200  | 1.33752900  | -0.50821500 |
| H | -1.61285700 | 0.67406200  | -0.39484200 |
| C | -1.62641000 | 0.14140800  | 2.31075000  |
| H | -1.38867700 | -0.47512400 | 3.18244500  |
| H | -1.97899400 | 1.10472300  | 2.68629500  |
| H | -2.46030400 | -0.31927600 | 1.77136000  |
| N | 0.56834100  | -1.92803300 | 2.02207300  |
| H | 1.25465400  | -1.50193800 | 2.63809600  |
| H | -0.24594500 | -2.17054000 | 2.57326600  |

|    |             |             |             |
|----|-------------|-------------|-------------|
| H  | -0.44624100 | -1.48757400 | 0.25931200  |
| Zn | -0.57286700 | 5.55403000  | 0.29908800  |
| Zn | 0.45180400  | -5.38207700 | 0.20428900  |
| N  | 0.89706200  | 4.15993100  | -0.16941500 |
| N  | 5.24392400  | 1.68846200  | -0.87042800 |
| N  | 2.21242400  | -4.36008000 | 0.34657600  |
| N  | -1.07125200 | -4.02586700 | -0.17072600 |
| N  | -5.44304100 | -1.55093900 | -0.89801500 |
| N  | -2.29872600 | 4.43842700  | 0.46790200  |
| O  | 3.70804000  | 0.42684100  | -1.96226200 |
| O  | 5.88801800  | -1.19417600 | -0.48907800 |
| O  | 5.82175700  | -1.19139800 | 1.76877600  |
| O  | -3.80751100 | -0.09208000 | -1.49879000 |
| O  | -6.11757300 | 1.40281400  | -0.27559300 |
| O  | -5.23037500 | 0.55606200  | 1.62376600  |
| C  | -4.14801300 | -1.18544900 | -1.05632400 |
| C  | -1.95320000 | -3.69462800 | 0.77954200  |
| H  | -1.81500800 | -4.18922200 | 1.73710400  |
| C  | -3.09476200 | -2.20356900 | -0.70581900 |
| C  | 5.65809900  | 2.94959300  | -0.22330900 |
| H  | 5.35464500  | 2.97339800  | 0.82468600  |
| H  | 5.19137400  | 3.79843300  | -0.73261100 |
| C  | 3.98427600  | 1.39176200  | -1.24118100 |
| C  | -1.17122300 | -3.45670500 | -1.37803500 |
| H  | -0.44704800 | -3.78260600 | -2.11747400 |
| C  | -5.24015100 | 1.37157800  | 0.73121000  |
| C  | 7.18391100  | 2.96607300  | -0.37838500 |
| H  | 7.56304800  | 3.97957700  | -0.51810200 |

|   |             |             |             |
|---|-------------|-------------|-------------|
| H | 7.65964200  | 2.55700800  | 0.51735600  |
| C | 1.15613300  | 3.86085600  | -1.44813000 |
| H | 0.56456700  | 4.39327700  | -2.18699100 |
| C | 2.13867400  | 2.95226400  | -1.81193000 |
| H | 2.31417500  | 2.72564100  | -2.85685900 |
| C | -3.87404500 | 3.00511700  | -0.61219600 |
| H | -4.29973000 | 2.61325300  | -1.52615800 |
| C | 2.90104100  | 2.34895900  | -0.81472000 |
| C | -5.91165900 | -2.91130100 | -0.57663900 |
| H | -5.44785900 | -3.63886300 | -1.25166000 |
| H | -5.65963500 | -3.19042500 | 0.44727500  |
| C | 1.60437400  | 3.55293900  | 0.79361600  |
| H | 1.35188100  | 3.83400100  | 1.81176800  |
| C | 3.80436500  | -3.19769400 | 1.68474200  |
| H | 4.19419800  | -2.94156100 | 2.66196600  |
| C | 6.38780700  | 0.95720100  | -1.43587500 |
| H | 6.08020900  | 0.52216000  | -2.38903700 |
| C | -6.51928000 | -0.70008300 | -1.42748800 |
| H | -6.13171900 | -0.14338900 | -2.28479300 |
| C | -2.70352800 | 3.98170700  | 1.66117700  |
| H | -2.19989700 | 4.40894100  | 2.52350000  |
| C | 5.42390000  | -1.59573100 | 0.70346200  |
| C | 4.34619400  | -2.61980500 | 0.54330400  |
| C | 2.72470100  | -4.05341100 | 1.54472700  |
| H | 2.22942800  | -4.50490900 | 2.39763700  |
| C | -7.03286400 | 0.31252600  | -0.40461700 |
| H | -7.96052300 | 0.76093400  | -0.76630100 |
| H | -7.19764500 | -0.14824400 | 0.57222300  |

|    |             |             |             |
|----|-------------|-------------|-------------|
| C  | -2.98280200 | -2.79289700 | 0.55250800  |
| H  | -3.67044200 | -2.54311300 | 1.35265300  |
| C  | -4.25978900 | 2.49656700  | 0.62414700  |
| C  | -7.42671900 | -2.83547200 | -0.78399200 |
| H  | -7.83946700 | -3.79126100 | -1.11065100 |
| H  | -7.92170800 | -2.56280700 | 0.15301100  |
| C  | -3.68001200 | 3.00565300  | 1.78175300  |
| H  | -3.97172600 | 2.62759900  | 2.75424600  |
| C  | 6.86768100  | -0.16257600 | -0.51792800 |
| H  | 7.78671800  | -0.59643500 | -0.92335800 |
| H  | 7.05430100  | 0.19151400  | 0.49857600  |
| C  | 3.83731400  | -2.96544500 | -0.70557700 |
| H  | 4.23537800  | -2.52481100 | -1.60999900 |
| C  | 2.61466100  | 2.64533400  | 0.51626100  |
| H  | 3.14384500  | 2.15438000  | 1.32310000  |
| C  | -7.59467200 | -1.72151000 | -1.82029100 |
| H  | -8.59970800 | -1.29373200 | -1.83163700 |
| H  | -7.38206700 | -2.10106300 | -2.82396500 |
| C  | 2.77148900  | -3.84716000 | -0.75708200 |
| H  | 2.33467600  | -4.16473600 | -1.69879500 |
| C  | -2.15408500 | -2.52762200 | -1.67987900 |
| H  | -2.18915900 | -2.06270600 | -2.65746700 |
| C  | 7.44367800  | 2.05830900  | -1.58525400 |
| H  | 8.46200900  | 1.66366300  | -1.61092800 |
| H  | 7.27106400  | 2.60234000  | -2.51835300 |
| C  | -2.88630600 | 3.97645200  | -0.64427600 |
| H  | -2.53392300 | 4.40686500  | -1.57689300 |
| Cl | -0.08235100 | 6.16316600  | 2.37281800  |

|    |             |             |             |
|----|-------------|-------------|-------------|
| Cl | -0.82198800 | 6.67351600  | -1.59880400 |
| Cl | -0.01973600 | -6.16276300 | 2.22934400  |
| Cl | 0.59809200  | -6.38450100 | -1.78478500 |
